1 **Title: BMP Signaling Downstream of the Highwire E3 Ligase Sensitizes Nociceptors**

2

3 **Authors**

4 Ken Honjo<sup>3</sup> and W. Daniel Tracey Jr<sup>1,2</sup>.

5 1 Department of Biology 2 Gill Center for Biomolecular Sciences, Indiana University, Bloomington

6 Indiana, 47405. 3 Faculty of Life and Environmental Sciences, University of Tsukuba, 1-1-1 Tennodai,

7 Tsukuba, Ibaraki 305-8572, Japan.

8 **Correspondence:**

9 Ken Honjo ([honjo.ken.ga@u.tsukuba.ac.jp](mailto:honjo.ken.ga@u.tsukuba.ac.jp)), Dan Tracey ([dtracey@indiana.edu](mailto:dtracey@indiana.edu))

10

11 **Short Title: The roles of Hiw and BMP signaling in regulating nociception**

12

13

14 **Abstract (max 300 words)**

15 A comprehensive understanding of the molecular machinery important for nociception is essential to  
16 improving the treatment of pain. Here, we show that the BMP signaling pathway regulates  
17 nociception downstream of the E3 ubiquitin ligase *highwire (hiw)*. *Hiw* loss of function in nociceptors  
18 caused antagonistic and pleiotropic phenotypes with simultaneous insensitivity to noxious heat but  
19 sensitized responses to optogenetic activation of nociceptors. Thus, *hiw* functions to both positively  
20 and negatively regulate nociceptors. We find that a sensory transduction-independent sensitization  
21 pathway was associated with BMP signaling. BMP signaling in nociceptors was up-regulated in *hiw*  
22 mutants, and nociceptor-specific expression of *hiw* rescued all nociception phenotypes including the  
23 increased BMP signaling. Blocking the transcriptional output of the BMP pathway with dominant  
24 negative Mad suppressed nociceptive hypersensitivity that was induced by interfering with *hiw*. The  
25 up-regulated BMP signaling phenotype in *hiw* genetic mutants could not be suppressed by mutation  
26 in *wallenda* suggesting that *hiw* regulates BMP in nociceptors via a *wallenda* independent pathway.  
27 In a newly established  $\text{Ca}^{2+}$  imaging preparation, we observed that up-regulated BMP signaling  
28 caused a significantly enhanced  $\text{Ca}^{2+}$  signal in the axon terminals of nociceptors that were stimulated  
29 by noxious heat. This response likely accounts for the nociceptive hypersensitivity induced by  
30 elevated BMP signaling in nociceptors. Finally, we showed that acute activation of BMP signaling in  
31 nociceptors was sufficient to sensitize nociceptive responses to optogenetically-triggered nociceptor  
32 activation without altering nociceptor morphology. Overall, this study demonstrates the previously

33 unrevealed roles of the Hiw-BMP pathway in the regulation of nociception and provides the first  
34 direct evidence that up-regulated BMP signaling physiologically sensitizes responses of nociceptors  
35 and nociception behaviors.

36

37 **Author Summary (150-200 words)**

38 Although pain is a universally experienced sensation that has a significant impact on human lives  
39 and society, the molecular mechanisms of pain remain poorly understood. Elucidating these  
40 mechanisms is particularly important to gaining insight into the clinical development of currently  
41 incurable chronic pain diseases. Taking an advantage of the powerful genetic model organism  
42 *Drosophila melanogaster* (fruit flies), we unveil the Highwire-BMP signaling pathway as a novel  
43 molecular pathway that regulates the sensitivity of nociceptive sensory neurons. Highwire and the  
44 molecular components of the BMP signaling pathway are known to be widely conserved among  
45 animal phyla, from nematode worms to humans. Since abnormal sensitivity of nociceptive sensory  
46 neurons can play a critical role in the development of chronic pain conditions, a deeper  
47 understanding of the regulation of nociceptor sensitivity has the potential to advance effective  
48 therapeutic strategies to treat difficult pain conditions.

## 49 **Introduction**

50 In spite of its clear medical importance, the molecular mechanisms of pain signaling remain poorly  
51 understood. Pain pathways in large part depend on sensory input from specialized sensory neurons  
52 called nociceptors (1). Since the activation of nociceptors leads to pain sensation and the  
53 sensitization of nociceptors is thought to be a major contributor of pain pathogenesis, understanding  
54 the molecular mechanisms controlling nociceptor function is essential for improving the treatment of  
55 pain (2).

56 *Drosophila melanogaster* is a powerful model system for neurogenetic studies of  
57 nociception. Larval *Drosophila* show stereotyped behavioral responses to potentially  
58 tissue-damaging stimuli, such as noxious heat or harsh mechanical stimulation (3). The most  
59 unambiguous larval nociception behavior involves a corkscrew like rolling around the long body axis  
60 (termed nocifensive escape locomotion (NEL) or simply “rolling”). Since rolling is specifically  
61 triggered by noxious stimuli and is clearly separable from normal larval locomotion, the analysis of  
62 NEL provides a robust behavioral paradigm to study nociception. Class IV multidendritic (md)  
63 neurons are polymodal nociceptors that are necessary for thermal and mechanical nociception in  
64 larvae (4). Optogenetic activation of the Class IV neurons is sufficient for triggering NEL(4, 5).  
65 Accumulating evidence in studies of fly nociception suggests that the molecular pathways of  
66 nociception are conserved between *Drosophila* and mammals (3, 6-15).  
67 To identify genes important for nociceptor function, we recently performed thermal nociception

68 screens in which we targeted the RNAi knockdown of nociceptor-enriched genes in a  
69 nociceptor-specific manner (16). In this screen, we found that two RNAi lines targeting *highwire* (*hiw*)  
70 caused driver dependent hypersensitivity in thermal nociception assays (revealed as a rapid  
71 response to a threshold heat stimulus) indicating a potential role for *hiw* as a negative regulator of  
72 nociceptor activity (16). *hiw* is an evolutionally conserved gene encoding an E3 ubiquitin ligase,  
73 whose function has been implicated in various aspects of neuronal development, synaptic function,  
74 and neuronal degeneration (17). However, in contrast, very little is known about the roles of *hiw* in  
75 sensory processing and in controlling behavior. Here, we present additional and more specific  
76 evidence that *hiw* plays an important role in the regulation of behavioral nociception and nociceptor  
77 sensitivity through the bone morphogenetic protein (BMP) pathway.

78

## 79 **Results**

### 80 **Highwire regulates the sensitivity of nociceptors**

81 To further investigate the potential function of *hiw* in nociception that was suggested by our  
82 previous study, we tested mutants for a strong loss-of-function allele of *hiw* (*hiw<sup>ND8</sup>*) in thermal  
83 nociception assays (18). Unexpectedly, we found that genetic mutants of *hiw* showed insensitivity to  
84 a noxious temperature probe of 42 or 46°C, which was, surprisingly, the opposite of the previously  
85 described *hiw* RNAi phenotype (Fig 1A and data not shown). Similar thermal insensitivity was also  
86 seen with other *hiw* alleles (Fig S1). Although *hiw* is widely expressed in the nervous system (18),

87 nociceptor-specific restoration of *hiw* expression rescued this insensitivity (Fig 1A), indicating that  
88 *hiw* function in nociceptors is sufficient for restoration of normal thermal nociception and the relevant  
89 site of action was in nociceptors.

90 Intrigued by the clear phenotypic distinction between genetic mutants and RNAi animals, we  
91 further dissected the nociception phenotype of *hiw* mutants by employing an optogenetic strategy.  
92 Optical activation of larval nociceptors via the blue light-gated cation channel Channelrhodopsin-2  
93 (ChR2) is sufficient to induce larval NEL (4, 5). Since nociceptor activation by ChR2 circumvents  
94 sensory transduction but still depends on the machinery essential for downstream signaling (Fig 1B),  
95 this technique has been utilized to distinguish genes that are important for primary sensory function  
96 from those that function in downstream aspects of signaling, such as action potential  
97 generation/propagation and/or synaptic transmission (10, 19). Using low intensity blue light (3.8 klux),  
98 which elicits NEL in about 20-30% of control animals expressing ChR2::YFP in nociceptors (Fig 1C),  
99 we found that the *hiw*<sup>ND8</sup> mutants had a significantly increased probability to show NEL, indicating  
100 that the mutant for this allele is hypersensitive in response to optogenetic activation of nociceptors  
101 (Fig 1C) even though it was insensitive in thermal nociception assays. Tissue specific rescue  
102 experiments again showed that nociceptor specific expression of *hiw* was sufficient to rescue this  
103 optogenetic hypersensitivity (Fig 1C). Taken together, these findings suggested that *hiw* has multiple,  
104 but dissociable, effects in the regulation of nociceptors. On the one hand, *hiw* regulated a sensory  
105 transduction-dependent function causing insensitivity, but it also regulated a function further

106 downstream of sensory transduction that caused hypersensitivity. Thus, the hypersensitivity seen in  
107 our earlier RNAi experiments is likely reflective of effects on the latter process.

108 To further examine *hiw*'s role, we tested the effects of expressing *hiw*Δ*RING* in nociceptors.  
109 The *hiw*Δ*RING* transcript encodes a mutated form of *hiw* lacking the RING domain that is  
110 responsible for E3 ligase activity (20, 21). This mutated protein has been proposed to function as a  
111 dominant-negative poison subunit in multimeric Hiw E3 ligase complexes. Similar to our original  
112 observations with *hiw* RNAi, expression of *hiw*Δ*RING* in nociceptors resulted in significant  
113 hypersensitivity in thermal nociception (Fig 1D and S2). This manipulation also caused  
114 hypersensitive optogenetic nociception responses (Fig 1E). As *hiw* encodes a large protein with  
115 many functional domains, and phenotypes of *hiw* mutants are known to show varied sensitivity to  
116 gene dosage (Wu et al., 2005), the observed similarity between *hiw*Δ*RING* overexpression and *hiw*  
117 RNAi is suggestive of dosage-dependent effects of *hiw* in nociceptors. For instance, the dominant  
118 negative approach may lead to an incomplete loss of function for *hiw* that is similar to the effects of  
119 RNAi.

120

### 121 **Hiw attenuates BMP signaling in nociceptors**

122 It has been very recently shown that the canonical BMP pathway in nociceptors is required for  
123 nociceptive sensitization after tissue damage in *Drosophila* (22). Since the BMP signaling pathway  
124 has also been proposed to be a downstream pathway regulated by Hiw in motoneurons (23), we

125 tested whether the BMP signaling pathway is regulated downstream of *Hiw* in nociceptors. We first  
126 examined the level of phosphorylated Mad (pMad) in nociceptor nuclei by quantitative  
127 immunohistochemistry, which is an established method for evaluating the activation level of  
128 intracellular BMP signaling (24-30). In nociceptor nuclei, *hiw* genetic mutants showed significantly  
129 elevated pMad levels (33%) in comparison to wild-type, even when processed together in the same  
130 staining solution (see also Materials and Methods) (Fig 2 A, B and F). A similarly modest change in  
131 pMad accumulation in motor neuron nuclei is associated with effects on presynaptic function and  
132 morphology at the neuromuscular junction (NMJ) (31, 32). An increased accumulation of pMad in the  
133 nucleus and the cytoplasm was observed in nociceptors expressing *hiw* $\Delta$ *RING* (Fig 2C and F).  
134 Expression of wild-type *hiw* in nociceptors of *hiw* mutant animals rescued the elevated pMad level  
135 (Fig 2D and F). We also confirmed that our immunohistochemistry successfully detected the  
136 increase of nuclear pMad caused by expressing the constitutively active form of *thick veins* (*tkv*<sup>OD</sup>),  
137 which activates the intracellular BMP signaling cascade independently of BMP ligands (33) (Fig 2E  
138 and F). These data together suggest that BMP signaling is negatively regulated downstream of *hiw* in  
139 larval nociceptors. In the larval motoneurons, it is known that pMad signals can be locally detected at  
140 synaptic boutons as well as nuclei (25, 34, 35). However, no detectable pMad signals were observed  
141 at synaptic terminals in larval nociceptors (Fig 2G).

142           Next we tested whether up-regulated BMP signaling in nociceptors is responsible for the  
143 hypersensitive nociceptive responses caused by *hiw* loss-of-function. *mad*<sup>1</sup> encodes a



144 dominant-negative form of Mad with disrupted DNA-binding ability (36). When *mad<sup>1</sup>* was expressed  
145 together with *hiw*Δ*RING* in nociceptors, the hypersensitive phenotype that was normally induced by  
146 the expression of *hiw*Δ*RING* alone was not detected (Fig 2H). Since neither expressing Mad<sup>1</sup>  
147 together with *hiw*Δ*RING* nor expressing Mad<sup>1</sup> alone in nociceptors induced insensitivity to noxious  
148 heat (Fig S3), these results indicate that hypersensitive nociception caused by weak *hiw* loss of  
149 function requires an intact BMP signaling pathway that normally operates through Mad. This result is  
150 consistent with the elevated pMad observed with *hiw* loss of function as playing a causal role in the  
151 hypersensitive phenotypes.

152         The MAP kinase kinase kinase (MAPKKK) *wallenda* (*wnd*) is a well-characterized target  
153 substrate of Hiw ligase (17). Hiw negatively regulates the protein level of Wnd, and the Hiw-Wnd  
154 interaction is crucial for normal synaptic growth, but not for normal synaptic function in NMJ (30,  
155 37-39). In addition, *hiw* interacts with *wnd* in Class IV neurons in the regulation of dendritic and  
156 axonal morphology (40). In larval motoneurons, it has been suggested that *wnd* is not involved in the  
157 regulation of BMP signaling (30). To test whether *wnd* is involved in the control of BMP signaling  
158 downstream of *hiw* in nociceptors, we examined a genetic interaction between *hiw* and *wnd* in double  
159 mutants. A *wnd* mutation in *hiw* mutant background did not suppress the elevated nuclear pMad level  
160 in nociceptors that we observed in the *hiw* mutant (Fig 3A-D and F), nor did *wnd* single mutants show  
161 altered nuclear pMad accumulation relative to controls (Fig 3E and F). Interestingly, significant  
162 up-regulation of nuclear pMad signal was observed in nociceptors overexpressing *wnd*, but not with

163 a kinase-dead version of *wnd* (Fig S4). Taken together, these results suggest that elevated nuclear  
164 pMad in *hiw* mutant nociceptors does not depend on the activity of Wnd, although overexpression of  
165 *wnd* with GAL4/UAS can cause elevated BMP signaling in nociceptors.

166 To gain insight into which regions of Hiw protein are involved in attenuating BMP signaling in  
167 nociceptors, we performed an expression study of a series of Hiw dominant negatives with various  
168 deletions, as established by Tian et al. (38) (Fig 4A). Expressing HiwNT (N-terminal half of Hiw)  
169 caused a greater than 200% increase in nuclear pMad signals compared to controls (Fig 4B, C and  
170 H). HiwCT (C-terminal half of Hiw) and Hiw $\Delta$ RCC1 resulted in 99% and 68% increases in nuclear  
171 pMad signals, respectively (Fig 4D, E and H). HiwCT and Hiw $\Delta$ RCC1 also caused marked  
172 accumulation of pMad signals in the cytoplasm of nociceptors (Fig 4D and E), which was also  
173 observed with Hiw $\Delta$ Ring expression (Fig 2C). This cytoplasmic accumulation of pMad signals is  
174 unlikely due to technical variability of immunostaining since the control samples treated in the same  
175 staining solutions with HiwCT or Hiw $\Delta$ RCC1 never developed such accumulations and cells nearby  
176 the nociceptors showed the normal pMad signal. In contrast, Hiw $\Delta$ HindIII and HiwCT1000  
177 (C-terminal only region of Hiw) did not cause any changes in nuclear pMad signals in nociceptors  
178 (Fig 4C, F and H). Thus, the attenuation of BMP signaling in nociceptors through Hiw appears to  
179 depend on different regions of Hiw from those that have been proposed to be involved in the  
180 regulation of NMJ morphology (Hiw $\Delta$ RCC1, and Hiw $\Delta$ HindIII function as dominant-negative in NMJ  
181 morphology while HiwNT and HiwCT1000 do not (38)). Because both HiwNT and HiwCT, which are

182 largely non-overlapping N-terminal and C-terminal halves of Hiw, caused increased nuclear pMad  
183 signals, multiple regions of the Hiw protein must be intact for normal suppression of BMP signaling in  
184 nociceptors.

### 185 **Elevated BMP signaling in nociceptors induces behavioral nociceptive hypersensitivity**

186 Although a previous study by Follansbee et al. suggests that the canonical BMP signaling pathway in  
187 larval nociceptors is a necessary component for nociceptive sensitization after tissue-damage,  
188 whether up-regulation of BMP signaling in nociceptors is sufficient to sensitize nociception has not  
189 been proven and potential mechanisms leading to sensitization are unknown. Because our data  
190 support the notion that the up-regulation of BMP signaling in nociceptors plays a key role in inducing  
191 sensitized nociception, we tested whether up-regulation of intracellular BMP signaling in nociceptors  
192 is sufficient to induce nociceptive hypersensitivity. In thermal nociception assays, animals expressing  
193 the constitutively active BMP receptor *tkv<sup>QD</sup>* in nociceptors did exhibit significant hypersensitivity (Fig  
194 5A and S2), and *tkv<sup>QD</sup>* also caused hypersensitive responses in optogenetic nociception assays. The  
195 latter suggests that elevated BMP signaling in nociceptors was able to sensitize nociception through  
196 a mechanism that was downstream of sensory transduction (Fig 5B). Although the dendritic structure  
197 of nociceptors in *tkv<sup>QD</sup>* overexpressors was not significantly altered (Fig 5C-E), overexpression of  
198 *tkv<sup>QD</sup>* caused overextension and overexpansion of nociceptor axon termini (Fig 5F-H). Combined,  
199 these data demonstrate that elevated BMP signaling in nociceptors is sufficient to sensitize thermal  
200 and optogenetic nociception behaviors in addition to causing increases in axon terminal branching.

201

202

203 **Elevated BMP signaling increases Ca<sup>2+</sup> responses in nociceptor terminals**

204 Since nociceptor-specific up-regulation of BMP signaling sensitizes thermal and optogenetic  
205 nociception behaviors, we next explored whether the up-regulation of intracellular BMP signaling  
206 actually sensitizes physiological responses of nociceptors. To observe neuronal responses of larval  
207 nociceptors to a range of thermal stimuli, we developed a preparation for optical recording from axon  
208 terminals of the nociceptive neurons. We then observed these terminals while we locally applied a  
209 thermal ramp stimulus to the larval body wall (Fig 6A). To monitor Ca<sup>2+</sup>, the genetically encoded  
210 sensor GCaMP6m was expressed under the control of *ppk-GAL4* (41). In control animals we  
211 observed a steep increase of the GCaMP6m signal in nociceptors when the ramping temperature  
212 reached the 39-47°C temperature range (Fig 6B and D). We found that nociceptors expressing *tkv<sup>OD</sup>*  
213 showed a significantly greater increase of GCaMP6m signals through 36-50°C in comparison to  
214 those in controls (Fig 6C and D), while basal fluorescence levels of GCaMP6m ( $F_0$ ) were comparable  
215 between the control and *tkv<sup>OD</sup>*-expressing nociceptors (Fig 6E). These results suggest that the  
216 significantly greater increase of GCaMP6m signals observed in nociceptors expressing *tkv<sup>OD</sup>* is due  
217 to the greater level of Ca<sup>2+</sup> influx triggered by the heat ramp stimulus, and not to unintended  
218 transcriptional upregulation of GCaMP6m. Thus, elevated BMP signaling in nociceptors results in  
219 exaggerated Ca<sup>2+</sup> signals at the terminals of nociceptors in response to heat in the noxious range.

220 This conclusion is consistent with the behavioral nociceptive sensitization induced by the same  
221 intracellular up-regulation of BMP signaling in nociceptors.

### 222 **Acute up-regulation of BMP signaling induces nociceptive hypersensitivity**

223 Chronic up-regulation of BMP signaling in nociceptors caused sensitization of behavioral nociception  
224 responses of larvae and an increased  $\text{Ca}^{2+}$  response of nociceptors to noxious heat, but also  
225 expansion of nociceptor terminals. To further separate the physiological and developmental effects of  
226 BMP up-regulation in nociceptors, we acutely up-regulated BMP signaling. Using the temperature  
227 sensitive repressor of GAL4 activity ( $\text{GAL80}^{\text{ts}}$ ) (42), we activated expression of  $tkv^{\text{QD}}$  in larval  
228 nociceptors by shifting  $ppk\text{-GAL4 UAS-Chr2::YFP tub-GAL80}^{\text{ts}}$  animals to 30°C for 24 hours. We  
229 then tested these larvae for sensitized optogenetic nociception. The acute induction of  $tkv^{\text{QD}}$  induced  
230 hypersensitivity in the optogenetic nocifensive responses and also significantly increased nuclear  
231 pMad levels relative to controls (Fig 7A and B). However, no detectable axonal overgrowth was  
232 induced by acute  $tkv^{\text{QD}}$  expression (Fig 7C and D). Unfortunately, we were not able to investigate the  
233 effects of this manipulation on nociception responses with a 39°C thermal stimulus because the  
234 prolonged incubation at 30°C interfered with 39°C NEL behavior in both controls and experimental  
235 animals (Fig S5). This latter finding indicates that the sensitivity of thermal nociception in *Drosophila*  
236 is modulated by the ambient temperature of the environment. Collectively, these data demonstrate  
237 that acute activation of BMP signaling in nociceptors is sufficient to sensitize larval nociceptive  
238 response in the absence of detectable changes to axonal morphology. Taken together with our  $\text{Ca}^{2+}$

239 imaging results, these data suggest a physiological, rather than a developmental, role for BMP

240 signaling in the regulation of nociceptor sensitivity.

## 241 **Discussion**

242 Identifying novel conserved molecular pathways that regulate nociception in model animals is a

243 promising strategy for understanding the molecular basis of pain signaling and pain pathogenesis

244 (43, 44). Using *Drosophila*, we found that both the E3 ligase Hiw and the downstream BMP signaling

245 pathway play crucial roles in regulating nociceptor sensitivity.

### 246 **Hiw's complexed roles in regulating nociceptor functions**

247 The data we present in this study suggest that *hiw* has at least two distinct functions in the regulation

248 of nociceptor sensitivity. We found that strong loss-of-function mutants of *hiw* showed insensitivity to

249 noxious heat but hypersensitivity to optogenetic stimulation of nociceptors (Fig 1A and C). Since

250 expressing wild-type *hiw* in nociceptors of *hiw* mutants rescued both phenotypes, loss of *hiw* in

251 nociceptors is responsible for these two ostensibly opposing phenotypes (Fig 1A and C). We also

252 found that nociceptor-specific expression of *hiw*RNAi or *hiw* $\Delta$ *RING* caused only hypersensitivity (Fig

253 1D and E) (16), indicating that the process that governs hypersensitivity is separable from the cause

254 of insensitivity. As insensitivity was epistatic to hypersensitivity in thermal nociception assays, we

255 used optogenetics to show that hypersensitivity is actually present in *hiw* genetic mutants as well as

256 in previously described RNAi animals. The use of optogenetic stimulation of neurons allowed us to

257 bypass the endogenous sensory transduction step(s) and to reveal this role. Our data suggest that

258 *hiw* is a) required for the negative regulation of a neural pathway that is downstream sensory  
259 transduction and b) required to confer normal sensitivity to noxious heat via sensory transduction  
260 pathways. As strong *hiw* loss of function causes reduced dendritic arbors (40) while *hiw* RNAi does  
261 not (16), it is possible that the reduced dendrite phenotype accounts for the insensitivity of the strong  
262 *hiw* alleles. Consistent with this hypothesis, many mutants that cause insensitive thermal nociception  
263 are associated with a reduction in the dendritic arbor (16). The phenotypic difference between strong  
264 loss-of-function mutants and RNAi or *Hiw* dominant-negative animals suggests that insensitive and  
265 hypersensitive phenotypes observed in *hiw* mutants have different sensitivity to the dosage of *hiw*.  
266 This has also been seen in the larval motor neuron system where it has been demonstrated that two  
267 different phenotypes of *hiw* in larval NMJ (overgrowth of synaptic boutons and diminished synaptic  
268 function) are separable by their different sensitivity to the dosage of *hiw* (20).

269 Our data also suggest that *hiw* may regulate distinct molecular pathways in motor neurons  
270 and in nociceptors. In the larval NMJ, mutations of *hiw* or expression of *hiw* $\Delta$ *RING* cause a  
271 diminished evoked excitatory junction potential (EJP) due to decreased quantal content in synaptic  
272 vesicles (18, 20, 45). However, this diminished evoked EJP phenotype is apparently opposite to the  
273 hypersensitive nociception phenotype observed in this study. Thus the downstream targets and/or  
274 pathways of *Hiw* in nociceptors may be distinct from those in motor neurons.

275 We identified the BMP signaling pathway as an important signaling pathway in nociceptors  
276 that is regulated downstream of *hiw*. In fly motor neurons, it has been proposed that BMP signaling is

277 a direct target of Hiw ligase (23). However, a later study reported that pMad up-regulation was not  
278 detected in motor neuron nuclei in *hiw* mutants (30) and controversy has arisen over this interaction.  
279 We found that nuclear pMad signals were up-regulated in *hiw* mutant nociceptors, and that this  
280 molecular phenotype was rescued by wild-type *hiw* expression (Fig 2). In addition, we also detected  
281 striking accumulation of pMad in both the nuclei and cytoplasm of nociceptors expressing Hiw  
282 dominant negative proteins (Fig 2 and 4). Finally, using *UAS-mad<sup>1</sup>*, we showed that a  
283 Mad-dependent pathway is responsible for the hypersensitive thermal nociception caused by  
284 *hiw*Δ*RING* expression (Fig 2H). Our data therefore support the idea that the nociceptor BMP  
285 signaling pathway is regulated downstream from *hiw*.

286         Although we demonstrated that BMP signaling is downstream of *hiw* in nociceptors, we have  
287 yet to determine the precise mechanism for Hiw regulation of BMP signaling. Our genetic analysis  
288 suggests that BMP signaling in nociceptors is regulated independently from the *wnd* pathway (Fig 3).  
289 Wnd is the best characterized target substrate of Hiw in the regulation of NMJ morphology (30, 37-40,  
290 46). Our expression analysis using various *hiw* deletion series showed that the set of *hiw* deletion  
291 constructs that induced up-regulation of BMP signaling in nociceptors was not identical to the set that  
292 induced abnormal synaptic morphology in motoneurons (38). This finding is somewhat consistent  
293 with the existence of a Wnd-independent mechanism in the regulation of BMP signaling in  
294 nociceptors, since the Hiw-Wnd pathway plays a pivotal role in regulating synaptic morphology in  
295 larval NMJ.



296 Intriguingly, our expression study of the *hiw* deletion series showed that the expression of  
297 HiwNT caused a prominent accumulation of nuclear pMad, while the expression of HiwCT or  
298 Hiw $\Delta$ RCC1 caused accumulation of pMad signals in both the nuclei and cytoplasm in nociceptors  
299 (Fig 4C-E). These data raise the possibility that Hiw is involved in at least two different mechanisms  
300 which regulate pMad: one pathway affecting nuclear pMad and another for cytoplasmic pMad. Given  
301 that *hiw* is a large protein with many functional domains for interacting with multiple molecules, the  
302 notion that *hiw* is involved in multiple processes regulating various aspects of neuronal functions in  
303 both motor neurons and nociceptive sensory neurons is perhaps unsurprising. Further studies are  
304 necessary to reveal the mechanisms of Hiw-dependent regulation of BMP signaling in nociceptors.

### 305 **Physiological effects of BMP signaling in nociceptor axon terminals**

306 We have presented a new physiological preparation for investigating the calcium levels in nociceptor  
307 terminals with a physiologically relevant noxious heat stimulus. This allowed us to demonstrate that  
308 up-regulation of BMP signaling in nociceptors sensitizes the physiological responses of nociceptors  
309 in response to noxious heat in addition to its effects on behavior (Fig 5 and 6). We also demonstrated  
310 that acute activation of intracellular BMP signaling in nociceptors is sufficient for the nociceptive  
311 sensitization (Fig 7). Although it has been previously reported that BMP signaling in nociceptors is  
312 required for nociceptive sensitization after tissue-injury in *Drosophila* (22), the mechanisms of the  
313 regulation of nociception by BMP signaling was totally unknown. Our study provides the first  
314 evidence that BMP signaling regulates calcium signaling in axon termini of nociceptors.

315           The BMP signaling pathway plays crucial roles in various developmental processes, such as  
316 embryonic patterning, skeletal development, and the development of neuronal circuits (47, 48). The  
317 roles of BMP signaling in the regulation of neuronal activity has also been extensively investigated in  
318 larval motor neurons, where BMP signaling plays crucial roles in the homeostatic regulation of  
319 synaptic morphology and transmission (49, 50). Since BMP signaling is important for synaptic  
320 transmission in larval NMJ, an interesting hypothesis is that BMP signaling in nociceptors functions  
321 to homeostatically regulate synaptic function (similar to that seen in motor neurons). Again, our  
322 study suggests that BMP signaling acts differently in nociceptors than in motor neurons. First,  
323 although our data show that activated intracellular BMP signaling in nociceptors resulted in  
324 hypersensitivity of nociception and nociceptor sensitivity, genetic manipulations that increase  
325 intracellular BMP signaling in motor neurons does not increase evoked EJP in larval NMJ (24, 27-29).  
326 Second, interfering with BMP signaling with dominant negative Mad did not cause nociception  
327 insensitive phenotypes (Fig S3) (consistent with another study that found that nociceptor-specific  
328 knockdown of BMP signaling components did not affect basal thermal nociception (22)). In contrast,  
329 loss of BMP signaling components in motor neurons decreased evoked EJP by disturbing  
330 homeostatic regulation of synapses (23, 35, 51). Finally, local pMad signals were detected at NMJ as  
331 well as at nuclei in motor neurons. This is relevant in that local pMad at the NMJ functions through a  
332 non-canonical signaling pathway to regulate synaptic maturation (25, 34). In the case of nociceptors,  
333 however, pMad signals were undetectable at nociceptor axon termini (Fig 2G). Although a full

334 understanding of the mechanisms through which BMP signaling regulates nociceptor sensitivity  
335 requires further investigation, these results indicate that BMP signaling may act differently in the  
336 nociceptors and motor neurons to regulate neuronal outputs.

### 337 **Potential conservation of Hiw-BMP pathway in regulating nociception in mammals**

338 Hiw and BMP signaling pathway components are all evolutionally well-conserved. The role of *hiw* in  
339 the negative regulation of nociceptive signaling may be as well. A mammalian *hiw* orthologue  
340 *Phr1/MYCBP2* has been previously implicated in a negative regulation of nociception processing.  
341 Specifically, it has been reported that *Phr1/MYCBP2* is expressed in DRG neurons, and that  
342 intrathecal injection of an antisense oligonucleotide against *Phr1/MYCBP2* causes hypersensitivity in  
343 formalin-induced nociceptive responses (52). Furthermore, nociceptive and thermoceptive  
344 neuron-specific *Phr1/MYCBP2* knock-out mice show prolonged formalin-triggered sensitization in  
345 thermal nociception, whereas no obvious phenotypes are observed for basal nociception in the  
346 knock-out animals (53). Decreased internalization of the TRPV1 channel (which is mediated through  
347 a p38 MAPK pathway) has been implicated in this prolonged nociceptive sensitization in *MYCBP2*  
348 knock-out mice (53). In contrast, whether BMP signaling plays a role in regulating nociception in  
349 mammals is unknown. Similarly, the degree to which the role of Hiw and BMP signaling is conserved  
350 in the physiological regulation of mammalian nociceptors represents a fascinating topic for future  
351 investigation.

352 Intriguingly, Hiw and BMP signaling have been implicated in nerve

353 regeneration/degeneration processes after axonal injury in both *Drosophila* and mammals (17, 54).  
354 In flies, axonal injury leads to decrease of Hiw, which leads to the upregulation of Wnd that promotes  
355 axonal degeneration in motor neurons (46). Phr1/MYCBP2 is also involved in promoting axonal  
356 degeneration after sciatic or optic nerve axotomy (55). Smad1 is known to be activated and play an  
357 important role for axonal regeneration after peripheral axotomy of DRG neurons (56-59). Because  
358 nerve injuries are thought to be one of key contributors for neuropathic pain conditions and  
359 peripheral axotomies are widely used to generate neuropathic pain models in mammals, it will be of  
360 particular interest in the future to determine whether the Hiw-BMP signaling pathway and  
361 up-regulation of intracellular BMP signaling in nociceptors play a role in the development of a  
362 neuropathic pain state in mammals.

363

## 364 **Materials and Methods**

### 365 **Fly strains**

366 Canton-S and *w<sup>1118</sup>* were used as control strains as indicated. The other strains used in this study  
367 were as follows: *ppk1.9-GAL4* (60), *UAS-mCD8::GFP* (61), *UAS-ChR2::YFP* line C (4), *hiw<sup>ND8(18)</sup>*,  
368 *hiw<sup>AN</sup>*, *hiw<sup>AC</sup>*, *UAS-hiw*, *UAS-hiwΔRing* (20), *UAS-hiwNT*, *UAS-hiwCT*, *UAS-hiwΔRCC*,  
369 *UAS-hiwΔHindIII*, *UAS-hiwCT1000* (38), *wnd<sup>1</sup>*, *wnd<sup>2</sup>*, *UAS-wnd* (30), *ppk1.9-GAL4*; *UAS>CD2*  
370 *stop>mCD8::GFP* *hs-flp*, *UAS-tkv<sup>QD</sup>* (33), *tub-GAL80<sup>ts</sup>* (62), *ppk-CD4-tdGFP* (63) and  
371 *UAS-GCaMP6m* (41). *UAS-mad<sup>1</sup>* (36)

372 **Thermal nociception assay**

373 The thermal nociception assay was performed as described previously (3, 6, 10, 16, 64). NEL latency  
374 was measured as initial contact of the thermal probe on the lateral side of the larval body wall to the  
375 completion of NEL (a 360° roll). Stimulation was ceased at 11 seconds. A thermal probe heated to  
376 46°C was used to examine the insensitive phenotype since it usually evokes NEL in less than 3  
377 seconds (3, 6, 10, 16, 65). A 39°C probe, which usually results in NEL in 9-10 seconds, was used to  
378 examine thermal hypersensitivity, as using a lower temperature probe is important to detecting the  
379 hypersensitive phenotype (16).

380 **Optogenetic nociception assay**

381 The optogenetic nociception assay was performed as described previously (5) with slight  
382 modifications. 3.8 klux was used to test for optogenetic hypersensitivity, but 76 klux blue light was  
383 used in the analysis of acute *tkv<sup>QD</sup>* induction (Fig 7). Because male larvae show a lower  
384 responsiveness to optogenetic nociceptor activation than females (Honjo, unpublished), male larvae  
385 were used to allow for more easily detectable hypersensitivity.

386 **Immunohistochemistry**

387 Antibodies used in this study were as follows: rabbit anti-GFP (Invitrogen, 1:1000), mouse anti-GFP  
388 (Invitrogen, 1:250), mouse anti-rat CD2 (AbD Serotec, 1:200), rabbit anti-pMad (gift from Ed Laufer,  
389 1:1000), goat anti-rabbit Alexa488 (Invitrogen, 1:1000), goat anti-rabbit Alexa568 (Invitrogen,  
390 1:1000), goat anti-mouse Alexa488 (Invitrogen, 1:1000) and goat anti-mouse Alexa568 (Invitrogen,

391 1:1000). Larvae were filleted, fixed in 4% paraformaldehyde for 30 minutes and then stained  
392 according to standard protocols.

### 393 **pMad staining and image analysis**

394 Wandering third instar larvae expressing mCD8::GFP in nociceptors were filleted and  
395 immunostained as described above. To minimize variation due to processing controls, experimental  
396 specimens were processed side-by-side within the same staining solutions. The dorsal Class IV  
397 multipolar neuron (ddaC) was imaged in segments A4-6 (Zeiss LSM 710 with a 100x/1.4  
398 Plan-Apochromat oil immersion or Olympus FV1200 with a 100x/1.4 UPLSAPO oil immersion).  
399 Z-stack images were converted to maximum intensity projections. To quantify nuclear pMad signals,  
400 nociceptor nuclei were identified based on the absence of GFP signal, and a region of interest (ROI)  
401 outlining the nucleus was delineated. The average signal intensity of nuclear pMad staining in the  
402 ROI was then calculated. Background signal intensity was determined as the mean from ROIs  
403 (identical size and shape of the nucleus from the image) drawn in the four corners of each image.  
404 The calculated background signal intensity was then subtracted from the nuclear pMad signal level.  
405 Data are plotted as nuclear pMad levels normalized to that of the co-processed control specimens.  
406 Image analyses were performed in Adobe Photoshop.

### 407 **Dendrite imaging and quantification**

408 Wandering third instar larvae expressing mCD8::GFP in nociceptors under the control of  
409 ppk1.9-GAL4 were anesthetized by submersion in a drop of glycerol in a chamber that contained a

410 cotton ball soaked by a few drops of ether. ddaC neurons in segments A4-6 were imaged on Zeiss  
411 LSM 5 Live with a 40x/1.3 Plan-Neofluar oil immersion objective lens. A series of tiled images were  
412 captured and assembled to reconstruct the entire dendritic field of the three A4-6 ddaC neurons.  
413 Z-stack images were then converted to maximum intensity projections. Dendritic field coverage was  
414 quantified as described previously (16).

#### 415 **Flip-out clone analysis of axon termini**

416 A *ppk1.9-GAL4; UAS>CD2 stop>mCD8::GFP hs-flp* strain was used to induce single cell flip-out  
417 clones in order to sparsely label nociceptors. Six virgin females and three males were used to seed  
418 vials containing a cornmeal molasses medium for a period of 2 days. The seeded vials were then  
419 heat-shocked in a 35°C water bath for 30 minutes. After an additional 3 to 5 days, wandering third  
420 instar larvae were harvested from the vials and dissected. In order to precisely identify the neurons  
421 responsible for the axons labeled in the CNS, the incision made in filleting the larvae was along the  
422 dorsal side, and the CNS remained attached to the fillet prep during immunostaining. mCD8::GFP  
423 and rat CD2 were detected using rabbit anti-GFP and mouse anti-rat CD2 primary antibodies, and  
424 visualized by anti-rabbit Alexa488 and anti-mouse Alexa568 secondary antibodies, respectively.  
425 Axon terminal branches of single cell flip-out clones were imaged in the abdominal ganglion using a  
426 Zeiss LSM 5 Live with a 40x/1.3 Plan-Neofluar oil immersion objective. The cell body of origin for  
427 each flip-out clone was then determined by inspecting the body wall of the corresponding fillet.  
428 Flip-out clones belonging to A1-7 segments were imaged and analyzed.

429 To analyze the projection patterns for axon terminals, the presence or absence of terminal  
430 branches in each neuromere and longitudinal tract was manually identified for each single nociceptor  
431 clone. In order to align clones projecting to different segments, positions relative to the entry  
432 neuromere were used. The neurons that aligned were then used to calculate the percentage  
433 projecting to each neuromere and longitudinal tract. Heat-maps were color-coded according to these  
434 percentages using Microsoft Excel and Adobe Illustrator.

435 The quantification of axon terminal area was performed in Matlab. Z-stack images of axon  
436 termini were converted to maximum intensity projections and manually cropped to exclude signals  
437 from other clones in the same sample. The green channel (GFP) and red channel (CD2) of the  
438 cropped images were separately binarized using Otsu's method (66). The number of GFP-positive  
439 pixels were counted to calculate the area innervating the termini. To compensate for differences in  
440 the size and shape of the ventral nerve cord, the number of GFP-positive pixels was normalized to  
441 the average size of a single neuromere, which was calculated as the number of CD2-positive pixels  
442 divided by the number of neuromeres in the cropped image.

#### 443 **Acute induction of *tkv*<sup>QD</sup> by *tub-GAL80*<sup>ts</sup>**

444 Larvae raised in normal fly vials for 5 or 6 days at 25°C, or larvae raised on apple juice plates  
445 containing ATR for 4 days at 25°C, were transferred to 30°C for 24 hours. In every experiment,  
446 experimental genotypes and control animals were treated side-by-side to minimize the effect of  
447 potential variations in temperature.



448 **Calcium imaging**

449 *The ppk1.9-GAL4 UAS-GCaMP6m* strain was crossed to either a control strain (*w<sup>1118</sup>*) or *UAS-tkv<sup>QD</sup>*  
450 strain. Activity of larval nociceptors were monitored at their axon terminals in the larval ventral nerve  
451 cord (VNC), which was exposed for imaging by a partial dissection as follows: wandering third instar  
452 larvae expressing GCaMP6m in Class IV md neurons were immobilized in ice cold hemolymph-like  
453 saline 3.1 (HL3.1) (70 mM NaCl, 5mM KCl, 1.5 mM CaCl<sub>2</sub>, 4 mM MgCl<sub>2</sub>, 10 mM NaHCO<sub>3</sub>, 5 mM  
454 Trehalose, 115 mM Sucrose, and 5 mM HEPES, pH 7.2)(67). The outer cuticle of each larvae was  
455 cut at segment A2/A3 to expose the central nervous system from which intact ventral nerves  
456 innervate the posterior larval body. The partially dissected animals were transferred to an imaging  
457 chamber containing HL3.1 equilibrated to the room temperature (23-25 °C). A strip of parafilm was  
458 placed over the larval VNC and was used to gently press the nerve cord down onto a coverslip for  
459 imaging. A Zeiss LSM5 Live confocal microscope and a 20x/0.8 Plan-Apochromat objective with a  
460 piezo focus drive were used to perform three-dimensional time-lapse imaging. Z-stacks consisting of  
461 10-11 optical slices (Z depth of 63 to 70 μm) of 256 x 128 pixel images were acquired at  
462 approximately 4 Hz. During imaging, and using a custom-made thermal probe, a heat ramp stimulus  
463 was applied locally to one side of the A5 to A7 segments. The temperature of the thermal probe was  
464 regulated using a variac transformer. 10V was used to generate a 0.1 °C/sec heat ramp stimulation  
465 and no voltage was applied during cooling. A thermocouple probe (T-type) wire was placed inside of  
466 the thermal probe to monitor the probe temperature, and the data were acquired at 4 Hz through a

467 digitizer USB-TC01 (National Instruments) and NI Signal Express software (National Instruments).  
468 The acquired images and temperature data were analyzed using Matlab software (Mathworks).  
469 Maximum intensity projections were generated from the time-series Z-stacks. Region of interest  
470 (ROI) was selected as a circular area with a diameter of 6 pixels, whose center was defined as the  
471 centroid of the A6 neuromere. Averaged fluorescent intensities ( $F$ ) were calculated for the ROI for  
472 each time point. The average of  $F$ s from the first 30 frames was used as a baseline ( $F_0$ ), and the  
473 percent change in fluorescent intensity from baseline ( $\Delta F/F_0$ ) was calculated for each time point.  
474 Since acquisitions of images and probe temperatures were not synchronized, probe temperature for  
475 each time point was estimated by a linear interpolation from the raw probe temperature reading. For  
476 a comparison of controls and  $tkv^{QD}$  OE,  $\Delta F/F_0$ , data were binned and averaged in 1°C intervals.

#### 477 **Statistical analyses**

478 To statistically compare proportional data, Fisher's exact test was used. Multiple comparisons of  
479 proportional data were corrected by the Bonferroni method. For non-proportional data,  
480 Mann-Whitney's U-test was used for pair-wise comparisons, and Steel's test (non-parametric  
481 equivalent of Dunnet's test) was used for multiple comparisons. Statistical analyses were performed  
482 in R software and Kyplot.

483 **Acknowledgements**

484 We thank TRiP at Harvard Medical School (NIH/NIGMS R01-GM084947), Aaron DiAntonio, Michael  
485 B. O'Connor, Gary Struhl, Chunlai Wu, and the Bloomington Stock Center for fly stocks. We are  
486 grateful to Dan Vasiliauskas, Susan Morton, Tom Jessell, and Ed Laufer for kindly providing the  
487 pMad antibody. We also thank Dr. Emiko Suzuki for her mentorship and helpful advice to KH. We  
488 acknowledge Hisako Honjo for technical assistance in dendrite analysis. Stephania Mauthner,  
489 Andrew Bellemer, and Melissa Christiansen made helpful suggestions on this manuscript. This work  
490 was supported by a grant from the National Institutes of Health (R01GM086458, W.D.T.) and JSPS  
491 KAKENHI (26890025, K.H.). K.H. was supported by postdoctoral fellowships from the Uehara  
492 Memorial Foundation, the Ruth. K. Broad Biomedical Research Foundation, the Japan Society for  
493 the Promotion of Science, and the National Institute of Genetics.

494

495 **References**

- 496 1. Woolf CJ, Ma Q. Nociceptors--noxious stimulus detectors. *Neuron*. 2007;55(3):353-64.
- 497 2. Gold MS, Gebhart GF. Nociceptor sensitization in pain pathogenesis. *Nat Med*.  
498 2010;16(11):1248-57.
- 499 3. Tracey WD, Jr., Wilson RI, Laurent G, Benzer S. painless, a *Drosophila* gene essential for  
500 nociception. *Cell*. 2003;113(2):261-73.
- 501 4. Hwang RY, Zhong L, Xu Y, Johnson T, Zhang F, Deisseroth K, et al. Nociceptive neurons  
502 protect *Drosophila* larvae from parasitoid wasps. *Curr Biol*. 2007;17(24):2105-16.
- 503 5. Honjo K, Hwang RY, Tracey WD, Jr. Optogenetic manipulation of neural circuits and  
504 behavior in *Drosophila* larvae. *Nat Protoc*. 2012;7(8):1470-8.
- 505 6. Zhong L, Bellemer A, Yan H, Honjo K, Robertson J, Hwang RY, et al. Thermosensory and  
506 non-thermosensory isoforms of *Drosophila melanogaster* TRPA1 reveal heat sensor domains of a  
507 thermoTRP channel. *Cell Rep*. 2012;1(1):43-55.
- 508 7. Kim SE, Coste B, Chadha A, Cook B, Patapoutian A. The role of *Drosophila* Piezo in  
509 mechanical nociception. *Nature*. 2012;483(7388):209-12.
- 510 8. Neely GG, Keene AC, Duchek P, Chang EC, Wang QP, Aksoy YA, et al. TrpA1 regulates  
511 thermal nociception in *Drosophila*. *PLoS One*. 2011;6(8):e24343.
- 512 9. Babcock DT, Shi S, Jo J, Shaw M, Gutstein HB, Galko MJ. Hedgehog signaling regulates  
513 nociceptive sensitization. *Curr Biol*. 2011;21(18):1525-33.

- 514 10. Zhong L, Hwang RY, Tracey WD. Pickpocket is a DEG/ENaC protein required for  
515 mechanical nociception in *Drosophila* larvae. *Curr Biol.* 2010;20(5):429-34.
- 516 11. Neely GG, Hess A, Costigan M, Keene AC, Goulas S, Langeslag M, et al. A genome-wide  
517 *Drosophila* screen for heat nociception identifies alpha2delta3 as an evolutionarily conserved pain  
518 gene. *Cell.* 2010;143(4):628-38.
- 519 12. Kang K, Pulver SR, Panzano VC, Chang EC, Griffith LC, Theobald DL, et al. Analysis of  
520 *Drosophila* TRPA1 reveals an ancient origin for human chemical nociception. *Nature.*  
521 2010;464(7288):597-600.
- 522 13. Babcock DT, Landry C, Galko MJ. Cytokine signaling mediates UV-induced nociceptive  
523 sensitization in *Drosophila* larvae. *Curr Biol.* 2009;19(10):799-806.
- 524 14. Neely GG, Rao S, Costigan M, Mair N, Racz I, Milinkeviciute G, et al. Construction of a  
525 global pain systems network highlights phospholipid signaling as a regulator of heat nociception.  
526 *PLoS Genet.* 2012;8(12):e1003071.
- 527 15. Im SH, Takle K, Jo J, Babcock DT, Ma Z, Xiang Y, et al. Tachykinin acts upstream of  
528 autocrine Hedgehog signaling during nociceptive sensitization in *Drosophila*. *eLife.* 2015;4:e10735.
- 529 16. Honjo K, Mauthner SE, Wang Y, Skene JH, Tracey WD, Jr. Nociceptor-Enriched Genes  
530 Required for Normal Thermal Nociception. *Cell Rep.* 2016;16(2):295-303.
- 531 17. Grill B, Murphey RK, Borgen MA. The PHR proteins: intracellular signaling hubs in neuronal  
532 development and axon degeneration. *Neural Dev.* 2016;11:8.

- 533 18. Wan HI, DiAntonio A, Fetter RD, Bergstrom K, Strauss R, Goodman CS. Highwire regulates  
534 synaptic growth in *Drosophila*. *Neuron*. 2000;26(2):313-29.
- 535 19. Husson SJ, Costa WS, Wabnig S, Stirman JN, Watson JD, Spencer WC, et al. Optogenetic  
536 analysis of a nociceptor neuron and network reveals ion channels acting downstream of primary  
537 sensors. *Curr Biol*. 2012;22(9):743-52.
- 538 20. Wu C, Wairkar YP, Collins CA, DiAntonio A. Highwire function at the *Drosophila*  
539 neuromuscular junction: spatial, structural, and temporal requirements. *J Neurosci*.  
540 2005;25(42):9557-66.
- 541 21. Deshaies RJ, Joazeiro CA. RING domain E3 ubiquitin ligases. *Annu Rev Biochem*.  
542 2009;78:399-434.
- 543 22. Follansbee TL, Gjelsvik KJ, Brann CL, McParland AL, Longhurst CA, Galko MJ, et al.  
544 *Drosophila* Nociceptive Sensitization Requires BMP Signaling via the Canonical SMAD Pathway. *J*  
545 *Neurosci*. 2017;37(35):8524-33.
- 546 23. McCabe BD, Hom S, Aberle H, Fetter RD, Marques G, Haerry TE, et al. Highwire regulates  
547 presynaptic BMP signaling essential for synaptic growth. *Neuron*. 2004;41(6):891-905.
- 548 24. Li W, Yao A, Zhi H, Kaur K, Zhu YC, Jia M, et al. Angelman Syndrome Protein Ube3a  
549 Regulates Synaptic Growth and Endocytosis by Inhibiting BMP Signaling in *Drosophila*. *PLoS Genet*.  
550 2016;12(5):e1006062.
- 551 25. Sulkowski MJ, Han TH, Ott C, Wang Q, Verheyen EM, Lippincott-Schwartz J, et al. A Novel,

- 552 Noncanonical BMP Pathway Modulates Synapse Maturation at the *Drosophila* Neuromuscular  
553 Junction. *PLoS Genet.* 2016;12(1):e1005810.
- 554 26. Zhang X, Rui M, Gan G, Huang C, Yi J, Lv H, et al. Neuroligin 4 Regulates Synaptic Growth  
555 via the Bone Morphogenetic Protein (BMP) Signaling Pathway at the *Drosophila* Neuromuscular  
556 Junction. *J Biol Chem.* 2017.
- 557 27. Zhao G, Wu Y, Du L, Li W, Xiong Y, Yao A, et al. *Drosophila* S6 Kinase like inhibits  
558 neuromuscular junction growth by downregulating the BMP receptor thickveins. *PLoS Genet.*  
559 2015;11(3):e1004984.
- 560 28. Nahm M, Lee MJ, Parkinson W, Lee M, Kim H, Kim YJ, et al. Spartin regulates synaptic  
561 growth and neuronal survival by inhibiting BMP-mediated microtubule stabilization. *Neuron.*  
562 2013;77(4):680-95.
- 563 29. Zhao L, Wang D, Wang Q, Rodal AA, Zhang YQ. *Drosophila* cyfip regulates synaptic  
564 development and endocytosis by suppressing filamentous actin assembly. *PLoS Genet.*  
565 2013;9(4):e1003450.
- 566 30. Collins CA, Wairkar YP, Johnson SL, DiAntonio A. Highwire restrains synaptic growth by  
567 attenuating a MAP kinase signal. *Neuron.* 2006;51(1):57-69.
- 568 31. Vanlandingham PA, Fore TR, Chastain LR, Royer SM, Bao H, Reist NE, et al. Epsin 1  
569 Promotes Synaptic Growth by Enhancing BMP Signal Levels in Motoneuron Nuclei. *PLoS One.*  
570 2013;8(6):e65997.

- 571 32. Shi W, Chen Y, Gan G, Wang D, Ren J, Wang Q, et al. Brain tumor regulates neuromuscular  
572 synapse growth and endocytosis in *Drosophila* by suppressing mad expression. *J Neurosci*.  
573 2013;33(30):12352-63.
- 574 33. Nellen D, Burke R, Struhl G, Basler K. Direct and long-range action of a DPP morphogen  
575 gradient. *Cell*. 1996;85(3):357-68.
- 576 34. Sulkowski M, Kim YJ, Serpe M. Postsynaptic glutamate receptors regulate local BMP  
577 signaling at the *Drosophila* neuromuscular junction. *Development*. 2014;141(2):436-47.
- 578 35. McCabe BD, Marques G, Haghghi AP, Fetter RD, Crotty ML, Haerry TE, et al. The BMP  
579 homolog Gbb provides a retrograde signal that regulates synaptic growth at the *Drosophila*  
580 neuromuscular junction. *Neuron*. 2003;39(2):241-54.
- 581 36. Takaesu NT, Herbig E, Zhitomersky D, O'Connor MB, Newfeld SJ. DNA-binding domain  
582 mutations in SMAD genes yield dominant-negative proteins or a neomorphic protein that can activate  
583 WG target genes in *Drosophila*. *Development*. 2005;132(21):4883-94.
- 584 37. Wu C, Daniels RW, DiAntonio A. Dfsc collaborates with Highwire to down-regulate the  
585 Wallenda/DLK kinase and restrain synaptic terminal growth. *Neural Dev*. 2007;2:16.
- 586 38. Tian X, Li J, Valakh V, DiAntonio A, Wu C. *Drosophila* Rae1 controls the abundance of the  
587 ubiquitin ligase Highwire in post-mitotic neurons. *Nat Neurosci*. 2011;14(10):1267-75.
- 588 39. Xiong X, Hao Y, Sun K, Li J, Li X, Mishra B, et al. The Highwire ubiquitin ligase promotes  
589 axonal degeneration by tuning levels of Nmnat protein. *PLoS Biol*. 2012;10(12):e1001440.



- 590 40. Wang X, Kim JH, Bazzi M, Robinson S, Collins CA, Ye B. Bimodal control of dendritic and  
591 axonal growth by the dual leucine zipper kinase pathway. *PLoS Biol.* 2013;11(6):e1001572.
- 592 41. Chen TW, Wardill TJ, Sun Y, Pulver SR, Renninger SL, Baohan A, et al. Ultrasensitive  
593 fluorescent proteins for imaging neuronal activity. *Nature.* 2013;499(7458):295-300.
- 594 42. McGuire SE, Mao Z, Davis RL. Spatiotemporal gene expression targeting with the TARGET  
595 and gene-switch systems in *Drosophila*. *Sci STKE.* 2004;2004(220):pl6.
- 596 43. Wang LX, Wang ZJ. Animal and cellular models of chronic pain. *Adv Drug Deliv Rev.*  
597 2003;55(8):949-65.
- 598 44. Leung C, Wilson Y, Khuong TM, Neely GG. Fruit flies as a powerful model to drive or  
599 validate pain genomics efforts. *Pharmacogenomics.* 2013;14(15):1879-87.
- 600 45. DiAntonio A, Haghghi AP, Portman SL, Lee JD, Amaranto AM, Goodman CS.  
601 Ubiquitination-dependent mechanisms regulate synaptic growth and function. *Nature.*  
602 2001;412(6845):449-52.
- 603 46. Xiong X, Wang X, Ewanek R, Bhat P, DiAntonio A, Collins CA. Protein turnover of the  
604 Wallenda/DLK kinase regulates a retrograde response to axonal injury. *J Cell Biol.*  
605 2010;191(1):211-23.
- 606 47. Bragdon B, Moseychuk O, Saldanha S, King D, Julian J, Nohe A. Bone morphogenetic  
607 proteins: a critical review. *Cell Signal.* 2011;23(4):609-20.
- 608 48. Hodge LK, Klassen MP, Han BX, Yiu G, Hurrell J, Howell A, et al. Retrograde BMP signaling

- 609 regulates trigeminal sensory neuron identities and the formation of precise face maps. *Neuron*.  
610 2007;55(4):572-86.
- 611 49. Bayat V, Jaiswal M, Bellen HJ. The BMP signaling pathway at the *Drosophila*  
612 neuromuscular junction and its links to neurodegenerative diseases. *Curr Opin Neurobiol*.  
613 2011;21(1):182-8.
- 614 50. Marques G. Morphogens and synaptogenesis in *Drosophila*. *J Neurobiol*.  
615 2005;64(4):417-34.
- 616 51. Eaton BA, Davis GW. LIM Kinase1 controls synaptic stability downstream of the type II BMP  
617 receptor. *Neuron*. 2005;47(5):695-708.
- 618 52. Ehnert C, Tegeder I, Pierre S, Birod K, Nguyen HV, Schmidtko A, et al. Protein associated  
619 with Myc (PAM) is involved in spinal nociceptive processing. *J Neurochem*. 2004;88(4):948-57.
- 620 53. Holland S, Coste O, Zhang DD, Pierre SC, Geisslinger G, Scholich K. The ubiquitin ligase  
621 MYCBP2 regulates transient receptor potential vanilloid receptor 1 (TRPV1) internalization through  
622 inhibition of p38 MAPK signaling. *J Biol Chem*. 2011;286(5):3671-80.
- 623 54. Zhong J, Zou H. BMP signaling in axon regeneration. *Curr Opin Neurobiol*. 2014;27:127-34.
- 624 55. Babetto E, Beirowski B, Russler EV, Milbrandt J, DiAntonio A. The Phr1 ubiquitin ligase  
625 promotes injury-induced axon self-destruction. *Cell Rep*. 2013;3(5):1422-9.
- 626 56. Saijilafu, Hur EM, Liu CM, Jiao Z, Xu WL, Zhou FQ. PI3K-GSK3 signalling regulates  
627 mammalian axon regeneration by inducing the expression of Smad1. *Nat Commun*. 2013;4:2690.

- 628 57. Parikh P, Hao Y, Hosseinkhani M, Patil SB, Huntley GW, Tessier-Lavigne M, et al.  
629 Regeneration of axons in injured spinal cord by activation of bone morphogenetic protein/Smad1  
630 signaling pathway in adult neurons. *Proc Natl Acad Sci U S A*. 2011;108(19):E99-107.
- 631 58. Zou H, Ho C, Wong K, Tessier-Lavigne M. Axotomy-induced Smad1 activation promotes  
632 axonal growth in adult sensory neurons. *J Neurosci*. 2009;29(22):7116-23.
- 633 59. Ma CH, Brenner GJ, Omura T, Samad OA, Costigan M, Inquimbert P, et al. The BMP  
634 coreceptor RGMb promotes while the endogenous BMP antagonist noggin reduces neurite  
635 outgrowth and peripheral nerve regeneration by modulating BMP signaling. *J Neurosci*.  
636 2011;31(50):18391-400.
- 637 60. Ainsley JA, Pettus JM, Bosenko D, Gerstein CE, Zinkevich N, Anderson MG, et al.  
638 Enhanced locomotion caused by loss of the *Drosophila* DEG/ENaC protein Pickpocket1. *Curr Biol*.  
639 2003;13(17):1557-63.
- 640 61. Lee T, Luo L. Mosaic analysis with a repressible cell marker for studies of gene function in  
641 neuronal morphogenesis. *Neuron*. 1999;22(3):451-61.
- 642 62. McGuire SE, Le PT, Osborn AJ, Matsumoto K, Davis RL. Spatiotemporal rescue of memory  
643 dysfunction in *Drosophila*. *Science*. 2003;302(5651):1765-8.
- 644 63. Han C, Jan LY, Jan YN. Enhancer-driven membrane markers for analysis of  
645 nonautonomous mechanisms reveal neuron-glia interactions in *Drosophila*. *Proc Natl Acad Sci U S A*.  
646 2011;108(23):9673-8.

- 647 64. Hwang RY, Stearns NA, Tracey WD. The Ankyrin Repeat Domain of the TRPA Protein  
648 Painless Is Important for Thermal Nociception but Not Mechanical Nociception. PLoS One.  
649 2012;7(1):e30090.
- 650 65. Tracey WD, Jr. Genetics Can Be Painless: Molecular Genetic Analysis of Nociception in  
651 Drosophila. 2007.
- 652 66. Otsu N. Threshold Selection Method from Gray-Level Histograms. IEEE T Syst Man Cyb.  
653 1979;9(1):62-6.
- 654 67. Feng Y, Ueda A, Wu CF. A modified minimal hemolymph-like solution, HL3.1, for  
655 physiological recordings at the neuromuscular junctions of normal and mutant Drosophila larvae. J  
656 Neurogenet. 2004;18(2):377-402.
- 657

658 **Figure legends**

659 **Fig 1. *hiw* is involved in both desensitizing and sensitizing pathways in nociceptors.**

660 (A) Insensitive thermal nociception in *hiw*<sup>ND8</sup> mutant and nociceptor-specific rescue of the insensitivity.  
661 In comparison to the control *w*<sup>1118</sup> (n = 119, 1.8 ± 0.2), *hiw*<sup>ND8</sup> (n = 114, 5.1 ± 0.3), no driver control  
662 (*hiw*<sup>ND8</sup>; UAS-*hiw*+, n = 108, 3.7 ± 0.2) and *hiw*<sup>ND8</sup> with GAL4 driver (*hiw*<sup>ND8</sup>; *ppk*-GAL4  
663 UAS-*mCD8::GFP*+, n = 101, 3.9 ± 0.2) all showed significantly delayed nociceptive responses to a  
664 46°C probe, while the rescue genotype (*hiw*<sup>ND8</sup>; *ppk*-GAL4 UAS-*mCD8::GFP*/UAS-*hiw*, n = 122, 1.7 ±  
665 0.1) had a normal response. \*\*\* p < 0.001 (Steel's test versus control). (B) A schematic of thermal  
666 and optogenetic stimulation of a nociceptor. While heat stimuli activate nociceptors via sensory  
667 transduction, ChR2 triggers nociceptor activation independently of sensory transduction. (C) The *hiw*  
668 genetic mutant expressing ChR2 in nociceptors was more responsive than the control to  
669 optogenetically triggered nociceptor activation, and the nociceptor-specific expression of *hiw* rescued  
670 optogenetic nociception responses to levels similar to control. Control (*w*<sup>1118</sup>/Y; *ppk*-GAL4  
671 UAS-*ChR2::YFP*+, n = 154, 31 ± 4%), *hiw*<sup>ND8</sup> (*hiw*<sup>ND8</sup>/Y; *ppk*-GAL4 UAS-*ChR2::YFP*+, n = 191, 75 ±  
672 3%) and *hiw* rescue (*hiw*<sup>ND8</sup>/Y; *ppk*-GAL4 UAS-*ChR2::YFP*/UAS-*hiw*, n = 112, 35 ± 5%). \*\*\* p < 0.001  
673 (Fisher's exact test with Bonferroni correction). (D) *hiw*Δ*Ring* expression (*hiw*Δ*Ring* OE) in  
674 nociceptors resulted in thermal hypersensitivity. *hiw*Δ*Ring* OE animals (*ppk*-GAL4 x UAS-*hiw*Δ*Ring*,  
675 n = 90, 5.7 ± 0.4) showed a significantly shortened latency to respond to a 39°C thermal probe  
676 compared to controls (*ppk*-GAL4 x *w*<sup>1118</sup>, n = 104, 8.8 ± 0.3). \*\*\* p < 0.001 (Mann-Whitney's U-test).

677 (E) *hiw* $\Delta$ *Ring* expression in nociceptors induced hypersensitivity to optogenetic nociceptor  
678 stimulation. *hiw* $\Delta$ *Ring*-expressing animals (*ppk-GAL4 UAS-ChR2::YFP x UAS-hiw* $\Delta$ *Ring*, n = 71, 55  
679  $\pm$  6%) exhibited increased responsiveness to optogenetic stimulation of nociceptors compared to  
680 control animals (*ppk-GAL4 UAS-ChR2::YFP x w<sup>118</sup>*, n = 64, 23  $\pm$  5%). \*\*\* p < 0.001 (Fisher's exact  
681 test). All error bars represent standard error.

682

683 **Fig 2. BMP signaling in nociceptors is negatively regulated at the downstream of *hiw***

684 (A-E) Representative images of pMad immunoreactivity in nociceptor cell bodies. Green represents  
685 mCD8::GFP and magenta shows pMad signals. (A'-E') Split images for pMad signals. (F)  
686 Quantification of nuclear pMad signals in nociceptors. *hiw*<sup>ND8</sup> mutants (*hiw*<sup>ND8</sup>; *ppk-GAL4*  
687 *UAS-mCD8::GFP*+, n = 21) and *hiw* $\Delta$ *Ring* OE (*ppk-GAL4 UAS-mCD8::GFP*+/; *UAS-hiw* $\Delta$ *Ring*+/+, n  
688 = 18) had 33  $\pm$  7% and 40  $\pm$  8% increases in nuclear pMad signals, respectively. No significant  
689 difference in nuclear pMad level compared to controls was detected in *hiw* rescue animals (*hiw*<sup>ND8</sup>;  
690 *ppk-GAL4 UAS-mCD8::GFP/UAS-hiw*, n = 24). Nociceptors expressing *tkv*<sup>QD</sup> (*ppk-GAL4*  
691 *UAS-mCD8::GFP x UAS-tkv*<sup>QD</sup>, n = 24) also showed significantly increased nuclear pMad levels (84  
692  $\pm$  7%). Control (*ppk-GAL4 UAS-mCD8::GFP*+, n > 24) \* p < 0.05, \*\*\* p < 0.001 (Mann-Whitney's  
693 U-test). (G) A projection image of axon terminal of Class IV neurons at A4 and A5 segments in the  
694 larval ventral ganglia. Green represents mCD8::GFP and magenta shows pMad signals. pMad  
695 signals at axon termini in nociceptors were not distinguishable from the background. (G') Split image

696 for mCD8::GFP. (G'') Split image for pMad signals. (H) Expression of *mad*<sup>1</sup> suppressed the thermal  
697 hypersensitivity in *hiw* $\Delta$ *Ring*-expressing animals. Control (*w*<sup>1118</sup> x *ppk-GAL4*, n = 73, 10.1  $\pm$  0.3),  
698 *hiw* $\Delta$ *Ring* OE (*ppk-GAL4* x *UAS-hiw* $\Delta$ *Ring*, n = 59, 6.7  $\pm$  0.4) and *hiw* $\Delta$ *Ring* & *mad*1 OE (*ppk-GAL4*  
699 *UAS-hiw* $\Delta$ *Ring* x *UAS-mad*<sup>1</sup>, n = 54, 10.6  $\pm$  0.2). \*\*\* p < 0.001 (Steel's test versus control). Error bars  
700 represent standard error.

701

### 702 **Fig 3. Activated BMP signaling in *hiw* mutant does not depend on *wallenda***

703 (A-E) Representative images of pMad immunoreactivity in nociceptor soma. Green shows  
704 mCD8::GFP and magenta represents pMad signals. (A'-E') Split images for pMad signals. (F)  
705 Quantification of nuclear pMad signals in nociceptors. Similarly to *hiw*<sup>ND8</sup> mutants (*hiw*<sup>ND8</sup>; *ppk-GAL4*  
706 *UAS-mCD8::GFP*+, n = 36), *hiw*<sup>ND8</sup> with heterozygous or transheterozygous *wnd* mutations  
707 (*hiw*<sup>ND8</sup>; *ppk-GAL4 UAS-mCD8::GFP*+/; *wnd*<sup>2</sup>/+ and *hiw*<sup>ND8</sup>; *ppk-GAL4 UAS-mCD8::GFP*+/;  
708 *wnd*<sup>1</sup>/*wnd*<sup>2</sup>, n = 48 and 45) showed significantly increased nuclear pMad level relative to controls  
709 (*ppk-GAL4 UAS-mCD8::GFP*+, n = 48). The transheterozygous *wnd* mutants (*ppk-GAL4*  
710 *UAS-mCD8::GFP*+/; *wnd*<sup>1</sup>/*wnd*<sup>2</sup>, n = 33) did not show a significant difference in nuclear pMad level  
711 compared to controls (p > 0.7). \*\* p < 0.01, \*\*\* p < 0.001 (Mann-Whitney's U-test). Error bars  
712 represent standard error.

713

### 714 **Fig 4. pMad signals in nociceptors expressing various *hiw* deletion constructs.**

715 (A) A schematic showing the structure of Hiw and Hiw deletion constructs. (B-G) Representative  
716 images of pMad immunoreactivity in nociceptor cell bodies. Green represents mCD8::GFP and  
717 magenta shows pMad signals. (B'-G') Split images for pMad signals. (H) Quantification of nuclear  
718 pMad signals in nociceptors. Nociceptors expressing *hiwNT* OE (*ppk-GAL4 UAS-mCD8::GFP* x  
719 *UAS-hiwNT*, n = 12), *hiwCT* OE (*ppk-GAL4 UAS-mCD8::GFP* x *UAS-hiwCT*, n = 12) and *hiwΔRCC1*  
720 OE (*ppk-GAL4 UAS-mCD8::GFP* x *UAS-hiwΔRCC1*, n = 12) showed nuclear pMad signals  
721 increased by  $218 \pm 26\%$ ,  $99 \pm 19\%$  and  $68 \pm 18\%$ , respectively. A significant difference in nuclear  
722 pMad level compared to controls was not detected in *hiwΔHindIII* OE (*ppk-GAL4 UAS-mCD8::GFP* x  
723 *UAS-hiwΔHindIII*, n = 12) or *hiwCT1000* OE (*ppk-GAL4 UAS-mCD8::GFP* x *UAS-hiwCT1000*, n =  
724 12). Control (*ppk-GAL4 UAS-mCD8::GFP/+*, n = 12) \*\* p < 0.01, \*\*\* p < 0.001 (Mann-Whitney's  
725 U-test). Error bars represent standard error.

726

727 **Fig 5. Activation of BMP signaling in nociceptors induces nociceptive hypersensitivity.**

728 (A) Animals expressing *tkv<sup>QD</sup>* in Class IV neurons showed thermal hypersensitivity. Control  
729 (*ppk-GAL4* x *w<sup>1118</sup>*, n=102,  $6.6 \pm 0.3$ ) and *tkv<sup>QD</sup>* OE (*ppk-GAL4* x *UAS-tkv<sup>QD</sup>*, n=118,  $5.0 \pm 0.3$ ). \*\* p <  
730 0.01 (Mann-Whitney's U-test). (B) Expression of *tkv<sup>QD</sup>* in Class IV neurons caused optogenetic  
731 hypersensitivity. *tkv<sup>QD</sup>* overexpressors expressing ChR2::YFP in nociceptors (*ppk-GAL4*  
732 *UAS-ChR2::YFP* x *UAS-tkv<sup>QD</sup>*, n = 74,  $59 \pm 6\%$ ) showed significantly elevated responsiveness to  
733 blue light-triggered nociceptor activation compared to controls (*ppk-GAL4 UAS-ChR2::YFP* x *w<sup>1118</sup>*, n



734 = 67, 21 ± 5%). \*\*\* p < 0.001 (Fisher's exact test). (C-E) Overexpression of *tkv<sup>QD</sup>* in nociceptors did  
735 not affect dendritic coverage. (C and D) Representative images of *ddaC* dendrites in control  
736 (*ppk-GAL4 UAS-mCD8::GFP* x *w<sup>1118</sup>*) and *tkv<sup>QD</sup>* overexpression (*ppk-GAL4 UAS-mCD8::GFP* x  
737 *UAS-tkv<sup>QD</sup>*) animals. Scale bars represent 100 μm. (E) Quantification of dendritic coverage. Dendritic  
738 coverage in *tkv<sup>QD</sup>*-overexpressing animals was indistinguishable from that in controls (n = 6 and 6, p  
739 > 0.3, Mann-Whitney's U-test). (F-H) Expression of *tkv<sup>QD</sup>* in nociceptors resulted in overextension of  
740 axon termini. (F) A representative image of a *v'ada* Class IV axon terminal in a *tkv<sup>QD</sup>* overexpressor  
741 (*ppk1.9-GAL4; UAS>CD2 stop>mCD8::GFP hs-flp* x *UAS-tkv<sup>QD</sup>*). Scale bar represents 5 μm. (G)  
742 Heat map of axonal projections. Animals with expression of *tkv<sup>QD</sup>* showed a severe overextension  
743 phenotype (n = 13) compared to controls (*ppk1.9-GAL4; UAS>CD2 stop>mCD8::GFP hs-flp* x *w<sup>1118</sup>*,  
744 n = 24). (H) Quantification of terminal size of the *v'ada* Class IV neuron. Terminal size of the *v'ada*  
745 axon was significantly increased in *tkv<sup>QD</sup>*-expressing animals (n = 13) compared to controls (n = 24).  
746 \*\*\* p < 0.001 (Steel's test versus control). All error bars represent standard error.

747

## 748 **Fig 6. Elevated BMP signaling increases Ca<sup>2+</sup> responses in nociceptor axon terminals**

749 (A) A cartoon showing the Ca<sup>2+</sup> imaging preparation to monitor GCaMP6m signals from nociceptor  
750 terminals during heat ramp stimuli. (B and B') Representative images showing thermal activation of  
751 nociceptors in control animals during calcium imaging (*ppk-GAL4 UAS-GCaMP6m* x *w<sup>1118</sup>*). In  
752 comparison to the initial frame (B), the GCaMP6m signal monitored at nociceptor axon termini was

753 increased when the probe temperature reached 40°C (B'). (C and C') Images showing a  
754 representative result of animals with nociceptor-specific up-regulation of BMP signaling (*tkv<sup>OD</sup>* OE,  
755 *ppk-GAL4 UAS-GCaMP6m x UAS-tkv<sup>OD</sup>*). Compared to the baseline (C), increase of GCaMP  
756 fluorescent intensity was observed when the probe temperature reached 40°C (C'). (D) Average  
757 percent increase of GCaMP6m fluorescent intensity relative to baseline ( $\Delta F/F_0$ ) during heat ramp  
758 stimulations.  $\Delta F/F_0$  is plotted to binned probe temperature (interval = 1 °C). In controls, GCaMP6m  
759 fluorescence in nociceptors began increasing when the probe temperature reached 37 °C, peaked at  
760 43°C, and returned to baseline at 47 °C. In comparison to controls, nociceptors of *tkv<sup>OD</sup>* OE animals  
761 showed a highly exaggerated fluorescent increase of GCaMP through 36°C to 50°C. n = 17 and 19  
762 for controls and *tkv<sup>OD</sup>* OE, respectively. \* p < 0.05, \*\* p < 0.01, \*\*\* p < 0.001 (Mann-Whitney's U-test).  
763 (E) Basal GCaMP6m signals ( $F_0$ ) did not differ significantly between controls and *tkv<sup>OD</sup>* OE (n = 17  
764 and 19). p > 0.6 (Mann-Whitney's U-test). All error bars represent standard error.

765

## 766 **Fig 7. Acute up-regulation of BMP signaling sensitizes optogenetic nociception**

767 (A) Acute expression of *tkv<sup>OD</sup>* induced hypersensitivity in optogenetic nociception. After 24 hour  
768 induction of *tkv<sup>OD</sup>* in Class IV nociceptors (*ppk-GAL4 UAS-ChR2::YFP/+; UAS-tkv<sup>OD</sup>/tub-GAL80<sup>ts</sup>*  
769 incubated at 30°C for 24 hours, n = 65, 32 ± 6%), larval nociceptive responses to optogenetic  
770 activation of Class IV nociceptors were significantly increased compared to those in controls  
771 (*ppk-GAL4 UAS-ChR2::YFP/+; tub-GAL80<sup>ts</sup>/+* incubated at 30°C for 24 hours, n = 73, 15 ± 4%). \* p <

772 0.05 (Fisher's exact test). (B) Acute induction of *tkv<sup>QD</sup>* increased nuclear pMad levels in nociceptors.  
773 pMad levels in nociceptor nuclei were significantly elevated ( $64 \pm 8\%$ ) in animals with 24 hour *tkv<sup>QD</sup>*  
774 induction (ppk-GAL4 UAS-mCD8::GFP/+; tub-GAL80<sup>ts</sup>/UAS-*tkv<sup>QD</sup>* incubated at 30°C for 24 hours, n  
775 = 12) compared to control animals (ppk-GAL4 UAS-mCD8::GFP/+; tub-GAL80<sup>ts</sup>/+ incubated at 30°C  
776 for 24 hours, n = 12). When raised at 25°C, animals with UAS-*tkv<sup>QD</sup>* (ppk-GAL4  
777 UAS-mCD8::GFP/ppk-CD4-tdGFP; tub-GAL80<sup>ts</sup>/UAS-*tkv<sup>QD</sup>*, n = 48) and controls (ppk-GAL4  
778 UAS-mCD8::GFP/ppk-CD4-tdGFP; tub-GAL80<sup>ts</sup>/+, n = 48) showed comparable pMad levels. \*\*\* p <  
779 0.001 (Mann-Whitney's U-test). (C and D) 24-hour induction of *tkv<sup>QD</sup>* did not induce axonal  
780 overgrowth. (C) A representative image of axon termini of a single v'ada neuron. Scale bar  
781 represents 5  $\mu\text{m}$ . (D) Heat map of v'ada axonal projection. 24-hour expression of *tkv<sup>QD</sup>* did not cause  
782 a severe overextension phenotype (n = 7). The heat map of the control is reused from Fig. 5G for  
783 comparison. All error bars represent standard error.

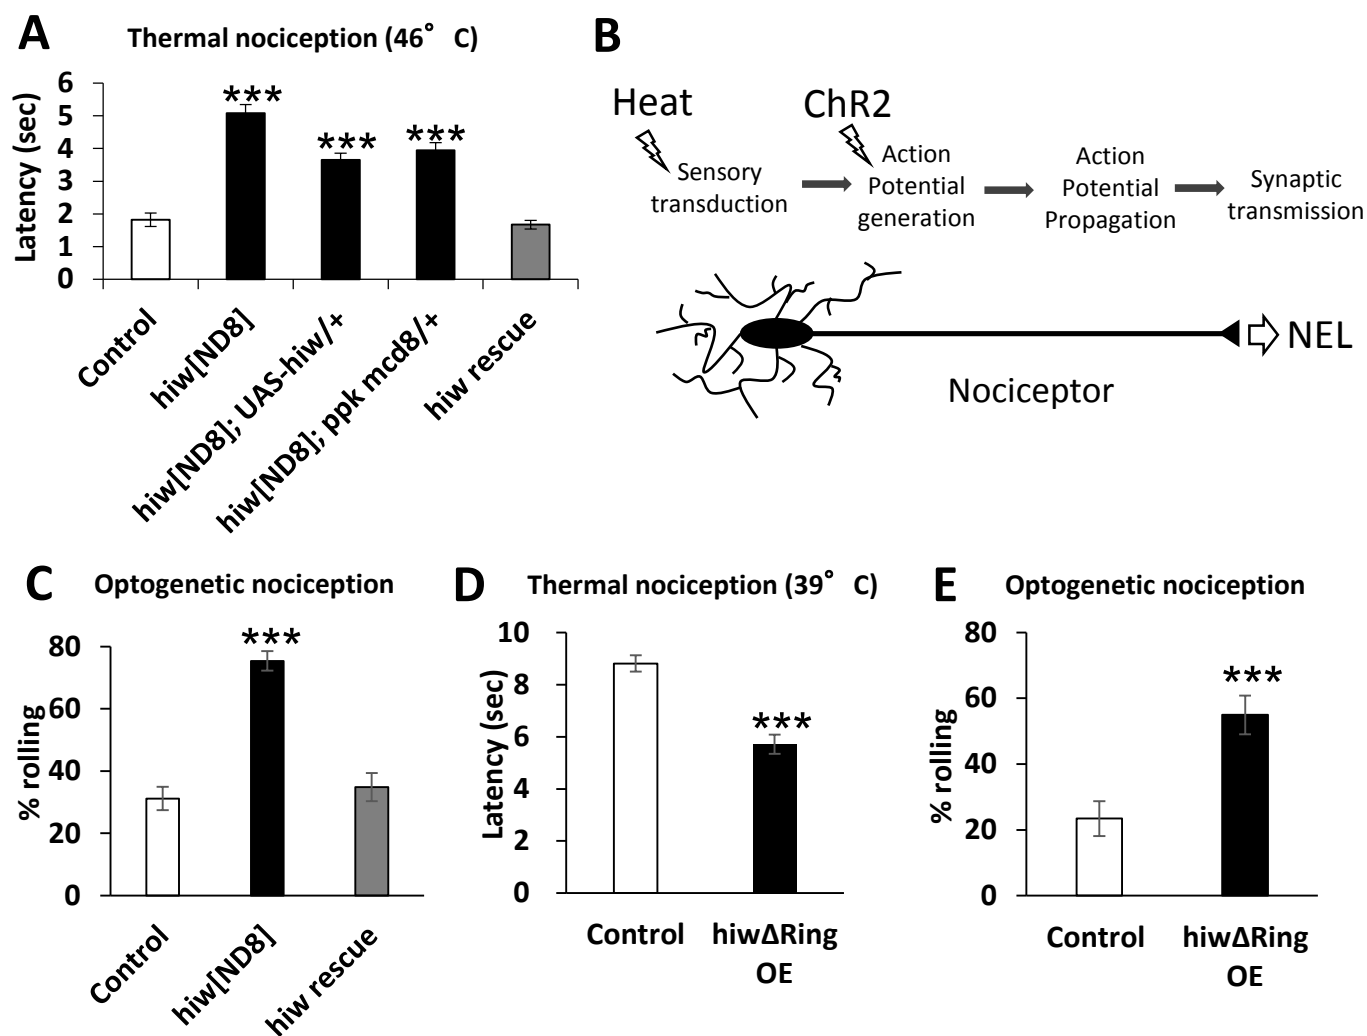

Figure 1

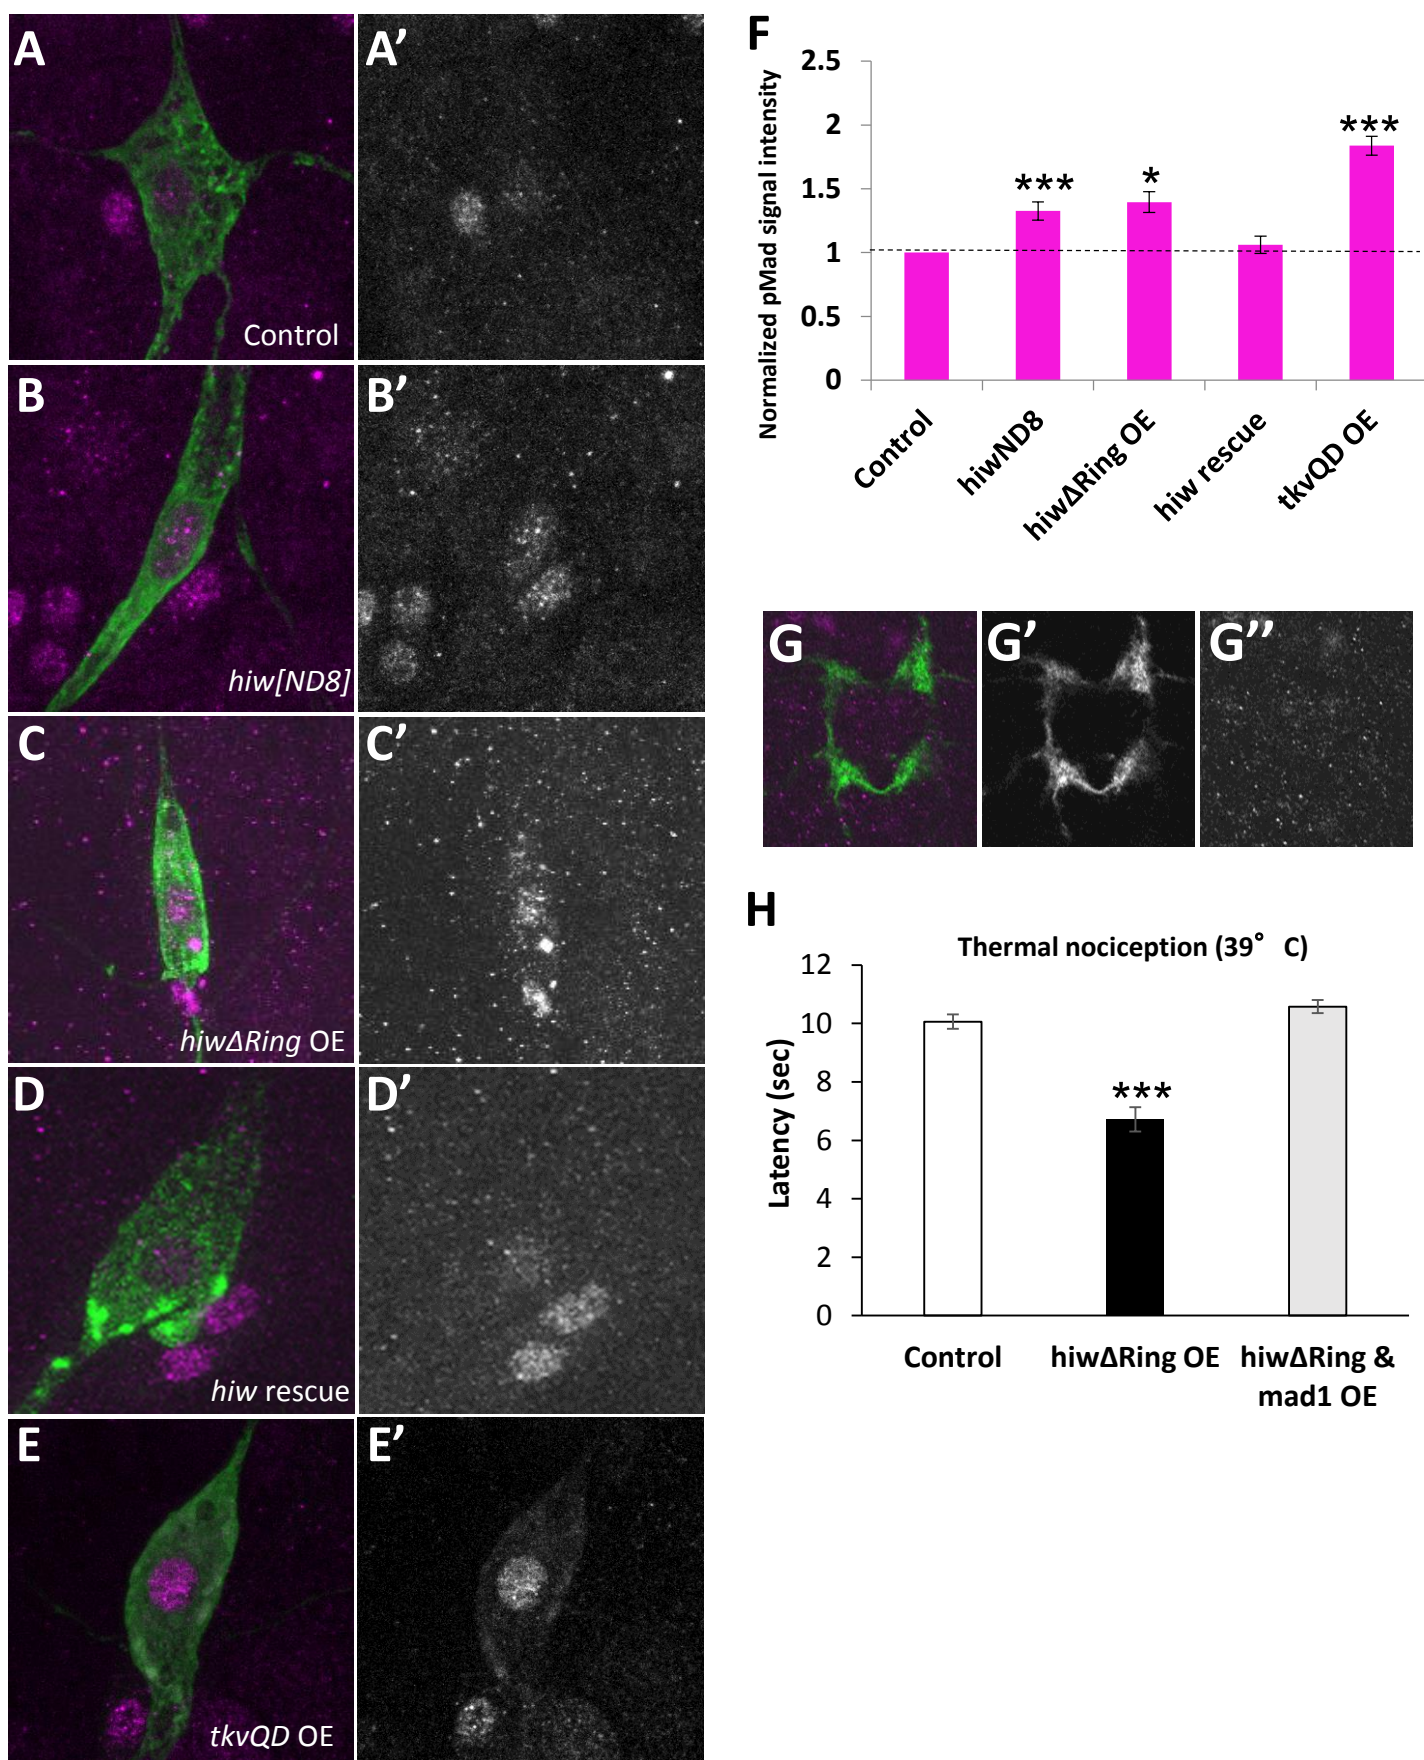

Figure 2

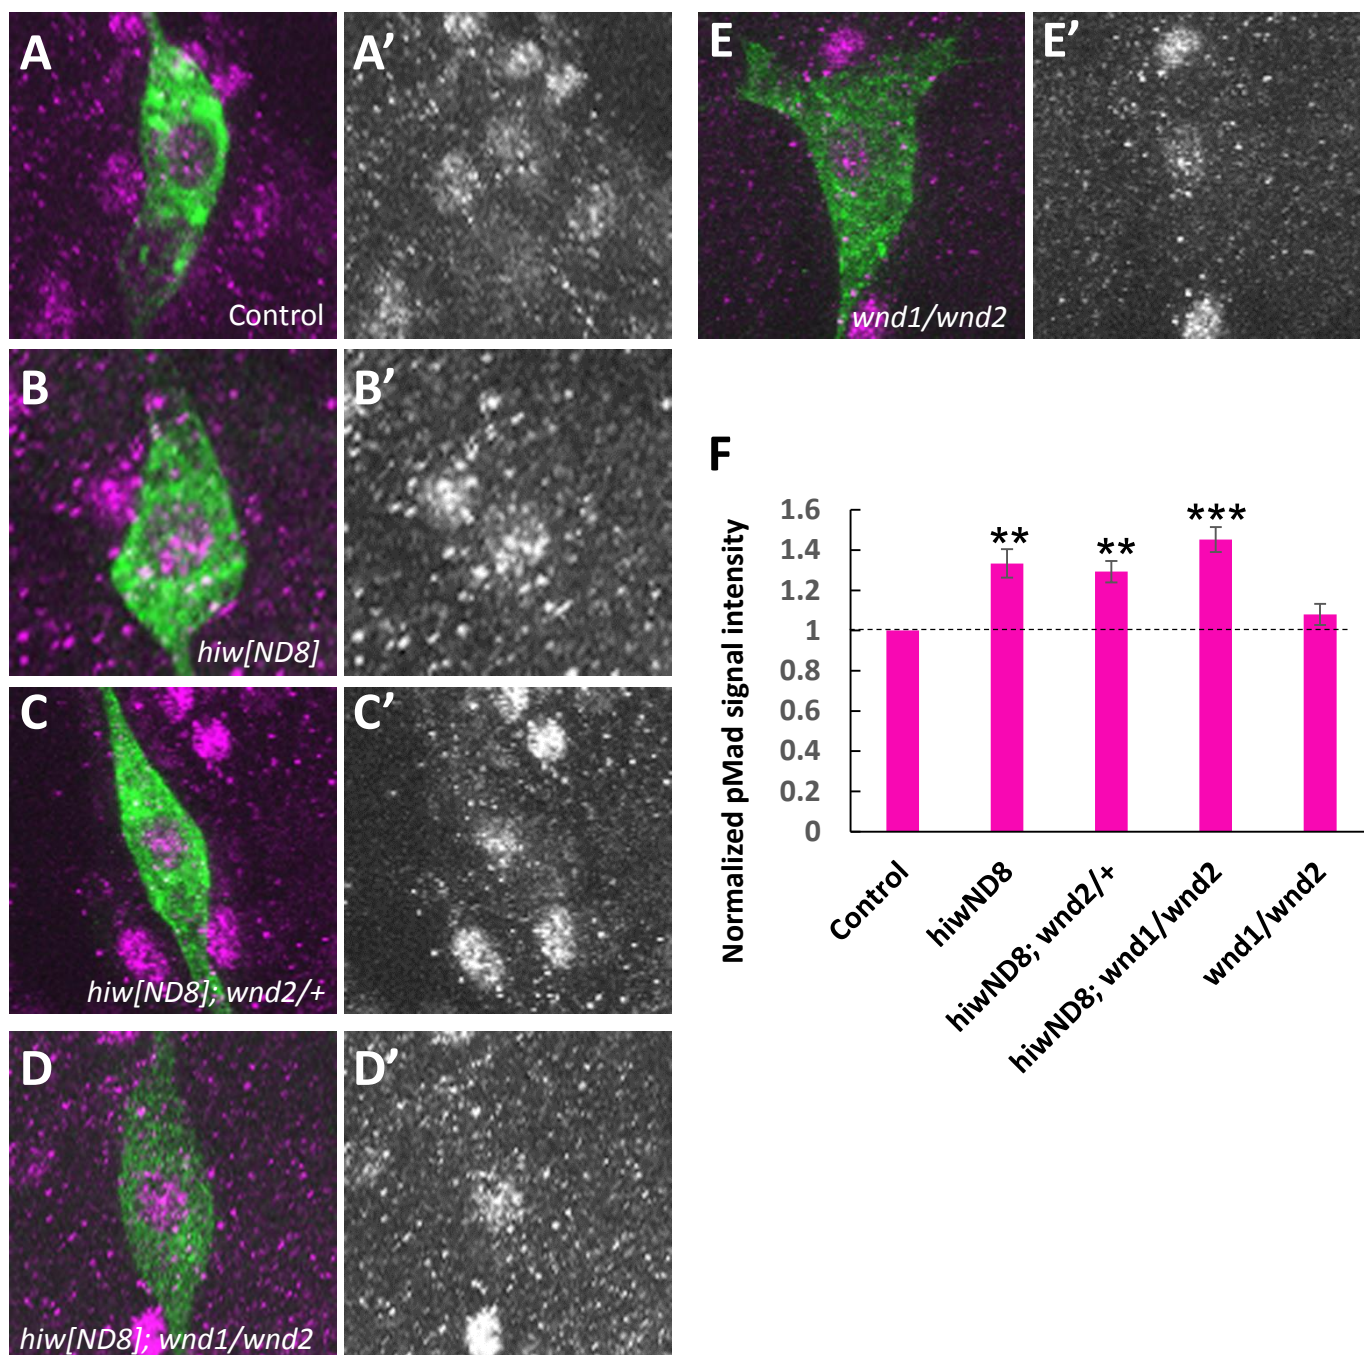

Figure 3

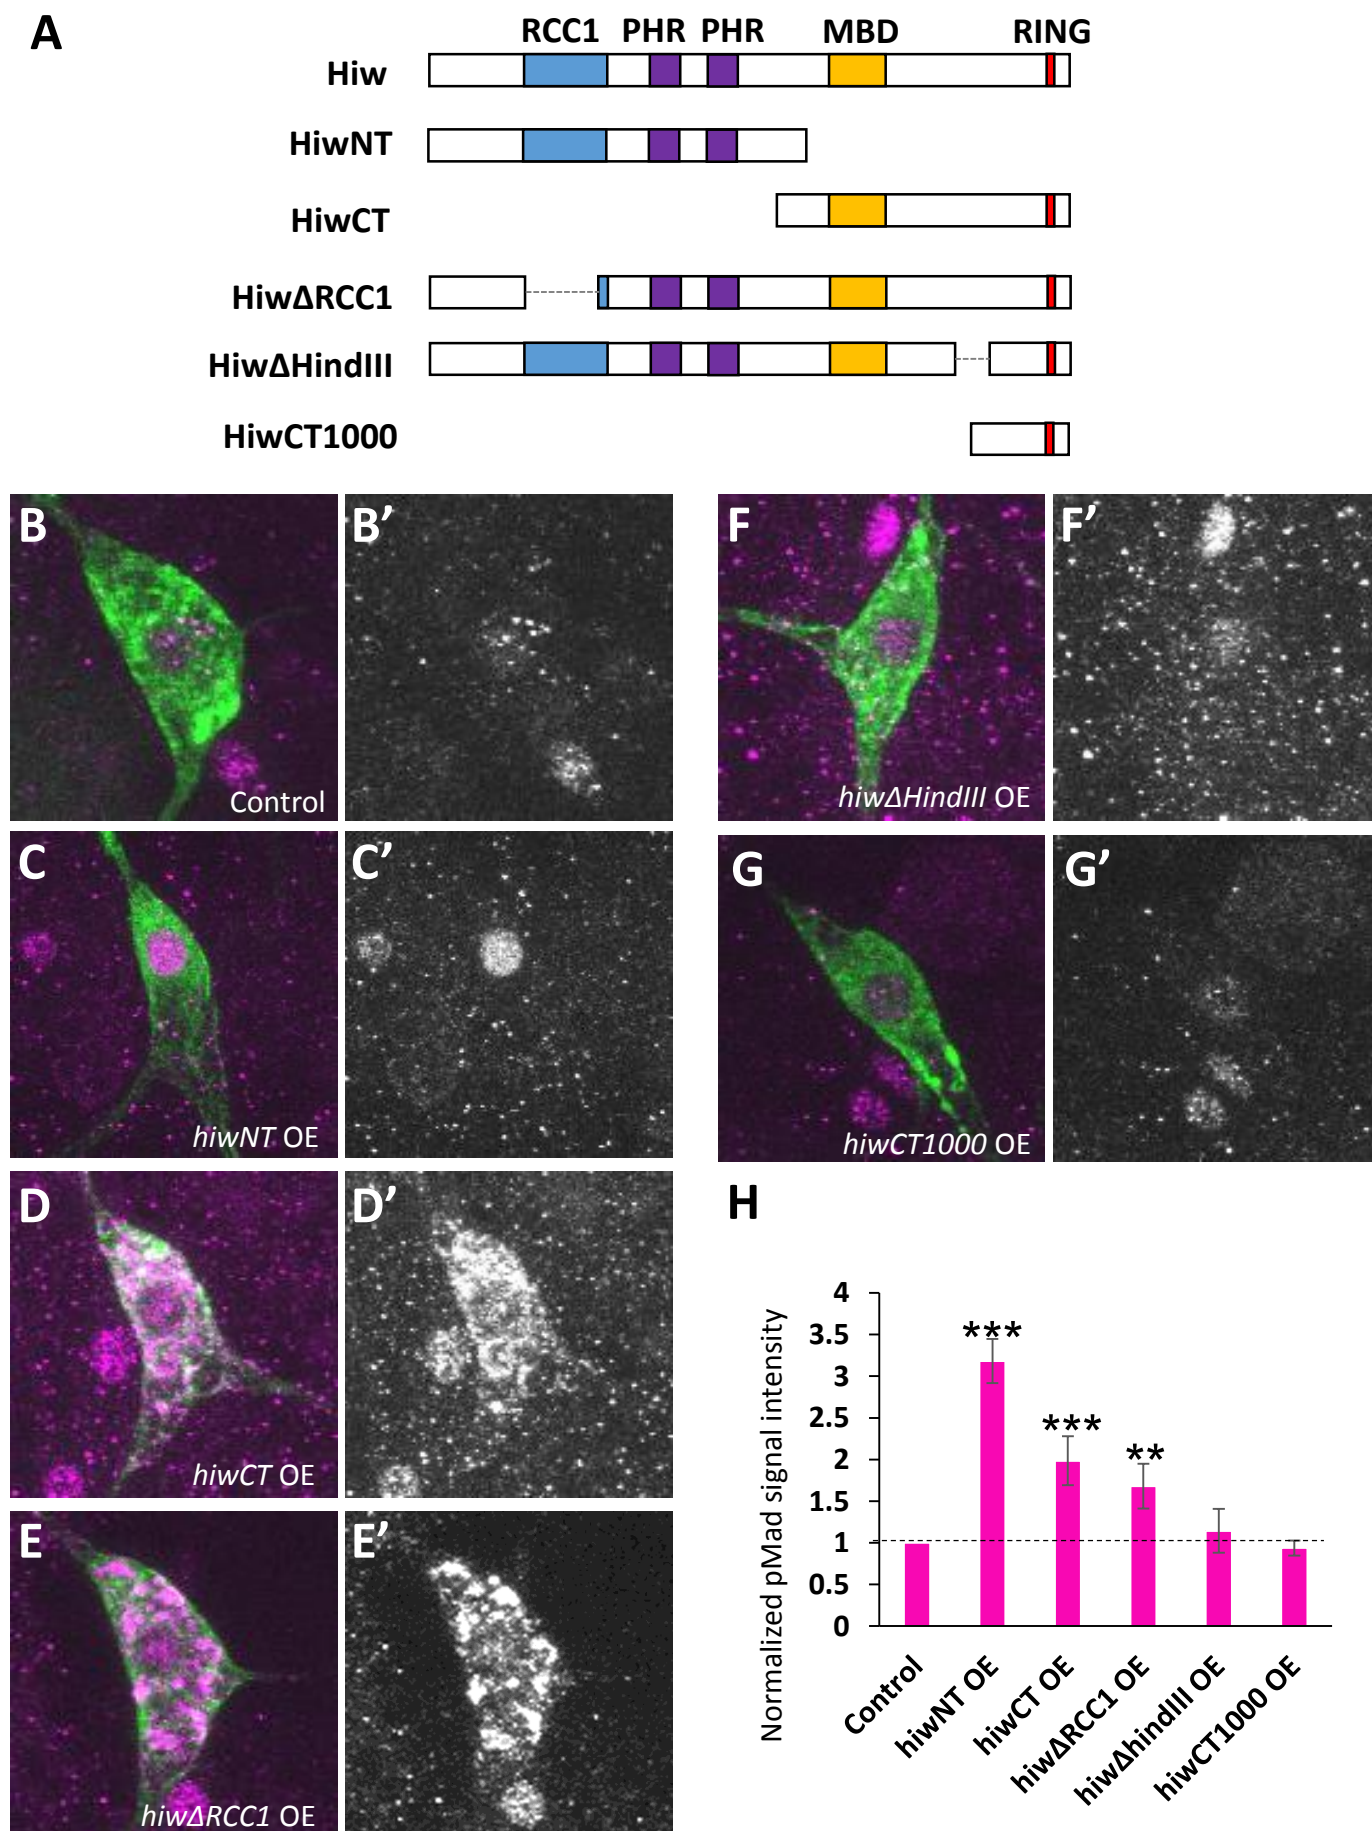

Figure 4

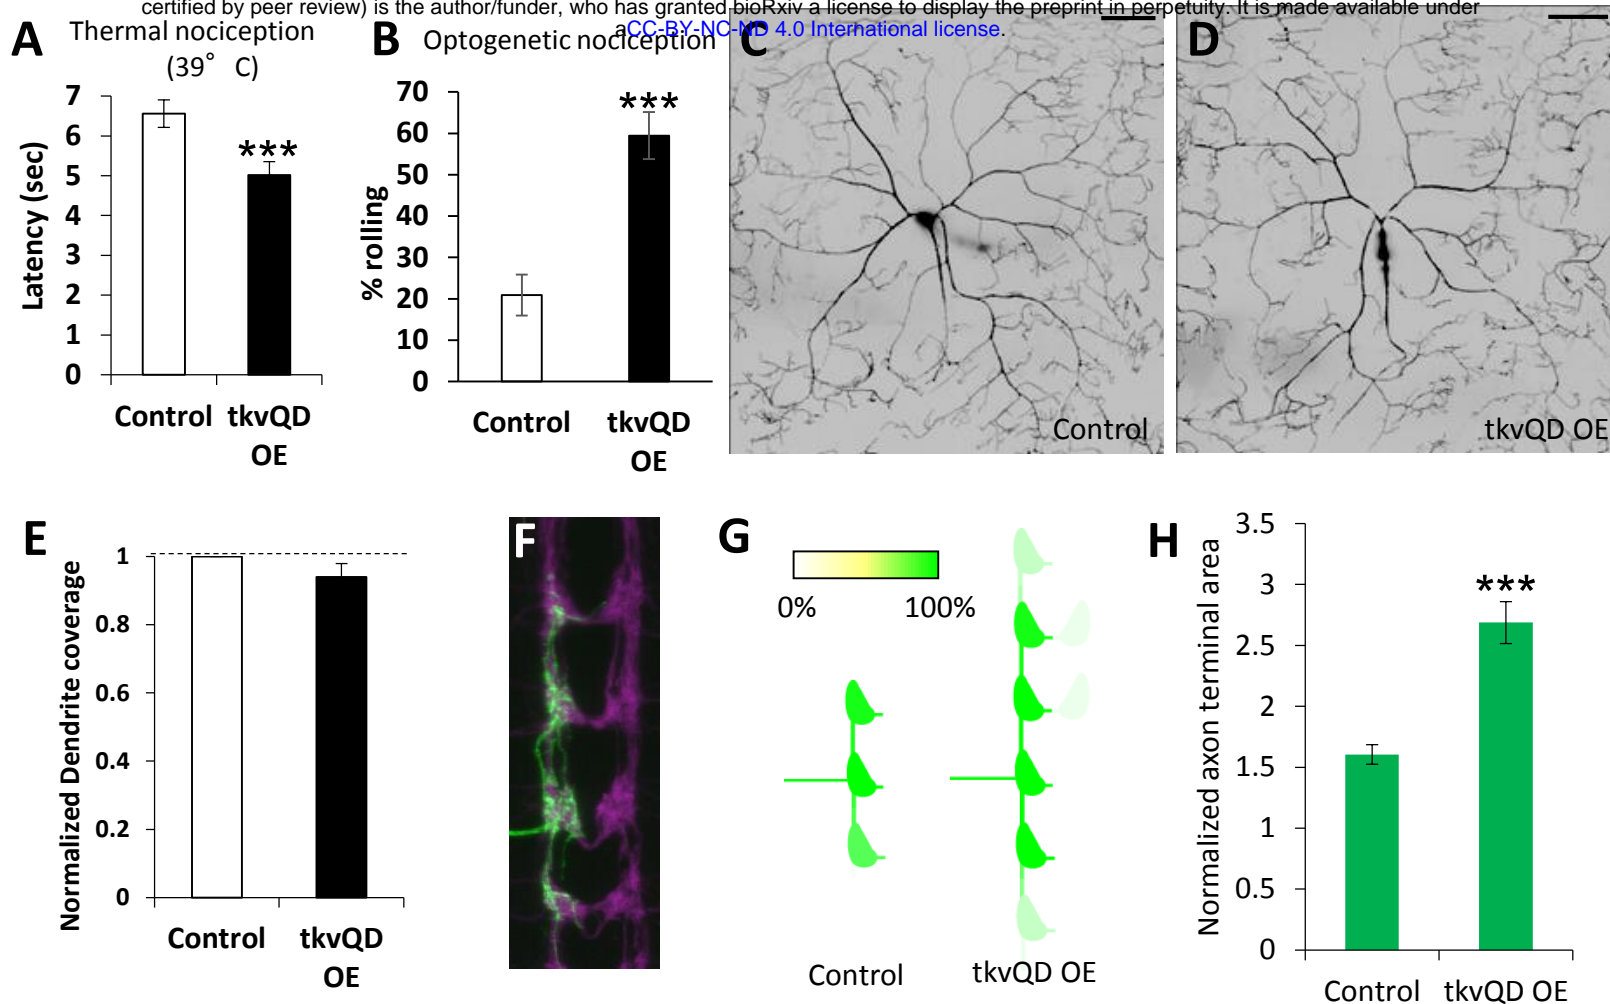

Figure 5



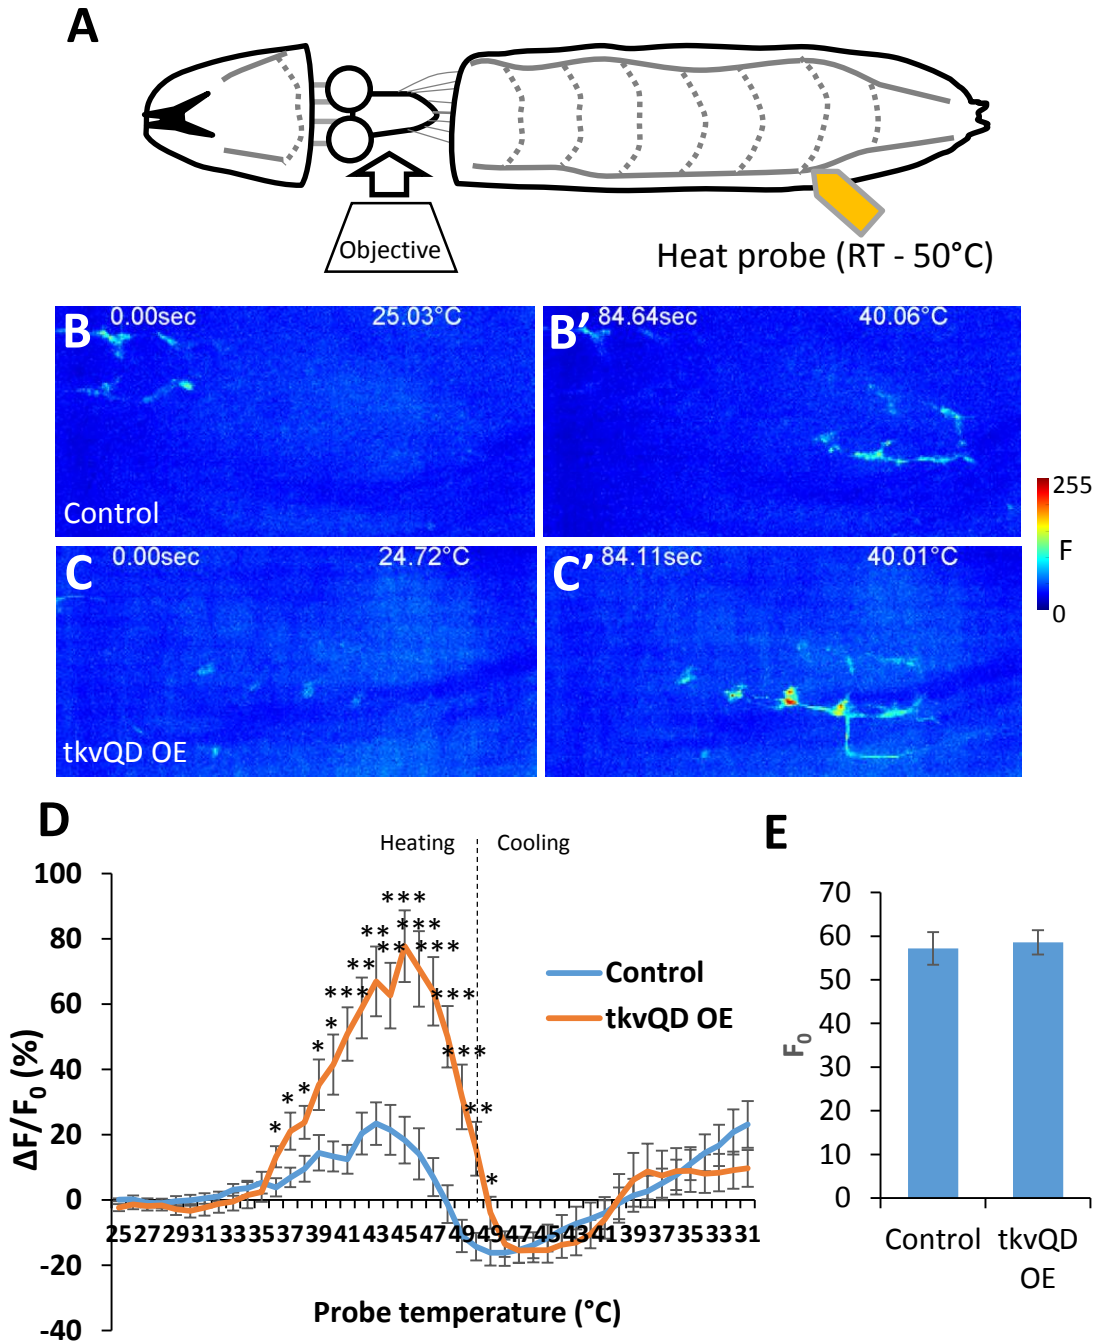

Figure 6

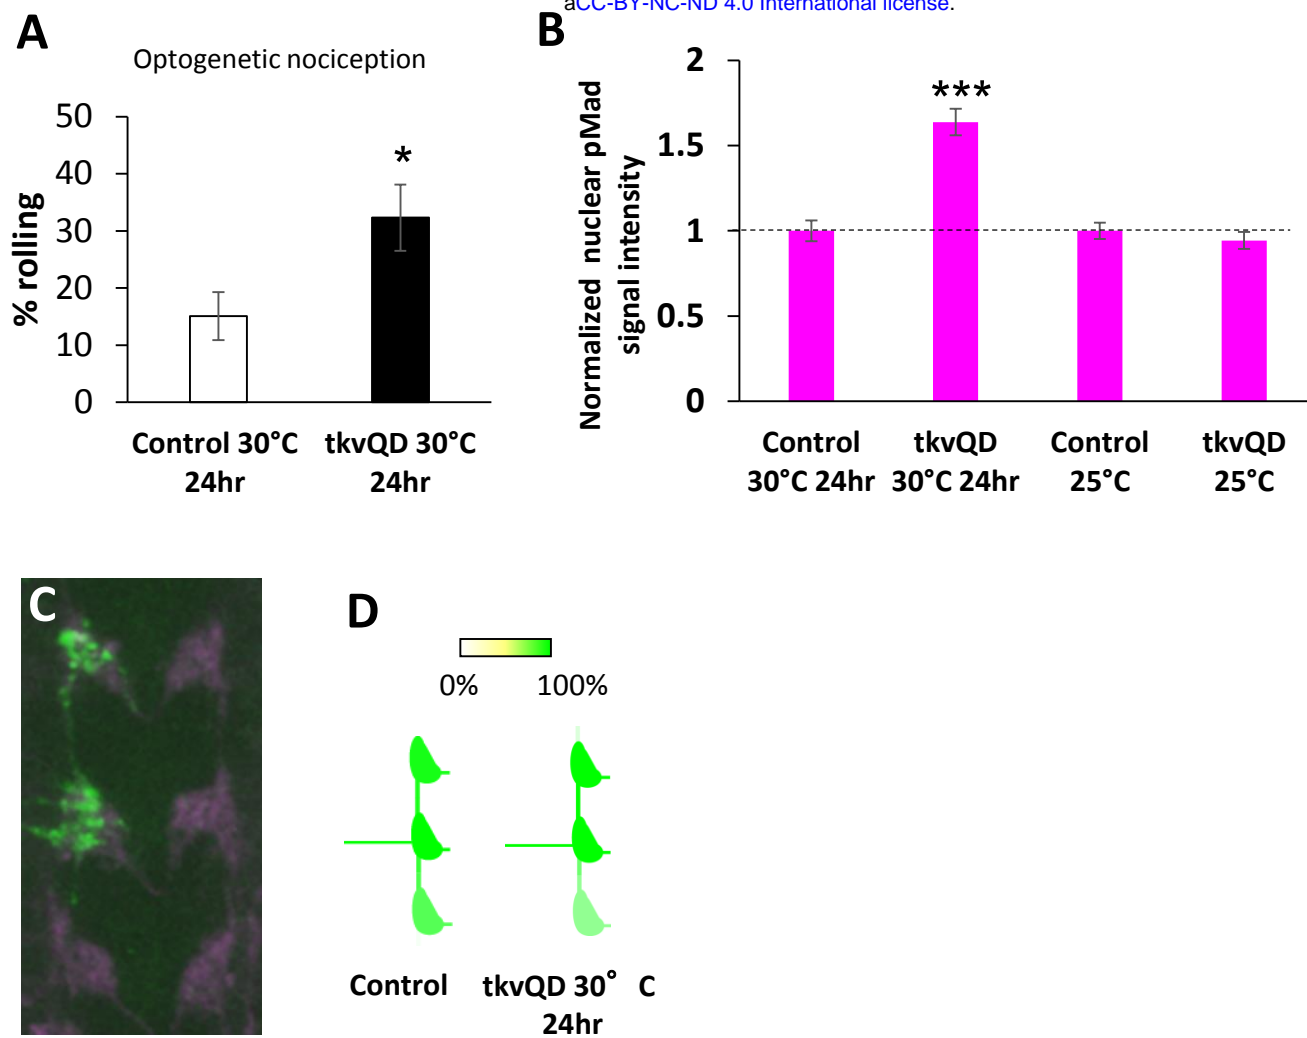

Figure 7
